# Supplementary material for: Discovery of a potent and highly β1 specific proteasome inhibitor from a focused library of urea-containing peptide vinyl sulfones and peptide epoxyketones
Source: Royal Society of Chemistry journal article supplement (doi:10.1039/c1ob06554h), 2011-10-13

## Supplementary Information

### Discovery of a potent and highly $\beta$ 1 specific proteasome inhibitor from a focused library of urea-containing peptide vinyl sulfones and peptide epoxyketones

Wouter A. van der Linden,<sup>a</sup> Lianne I. Willems,<sup>a</sup> Tamer B. Shabaneh,<sup>b</sup>  
Nan Li,<sup>a</sup> Mark Ruben,<sup>a</sup> Bogdan Florea,<sup>a</sup> Gijs A. van der Marel,<sup>a</sup> Markus  
Kaiser,<sup>c</sup> Alexei F. Kisselev,<sup>\*b</sup> Herman S. Overkleeft<sup>\*a</sup>

*a. Gorlaeus Laboratories, Einsteinweg 55, 2300 CC, Leiden, The Netherlands. Fax: +31-71-5274307; Tel: +31-71-5274342; E-mail: h.s.overkleeft@chem.leidenuniv.nl*

*b. Norris Cotton Cancer Center, Dartmouth Medical School, Dartmouth College, Lebanon, NH 03756, USA. E-mail: alexei.f.kisselev@dartmouth.edu*

*c. ZMB/Faculty of Biology, Building S03 S02 A55, Universität Duisburg-Essen, Campus Essen, 45117 Essen, Germany. Tel: +49-201-183-4980; Email: Markus.Kaiser@uni-due.de*

Figure S1: NMR spectra of new compounds

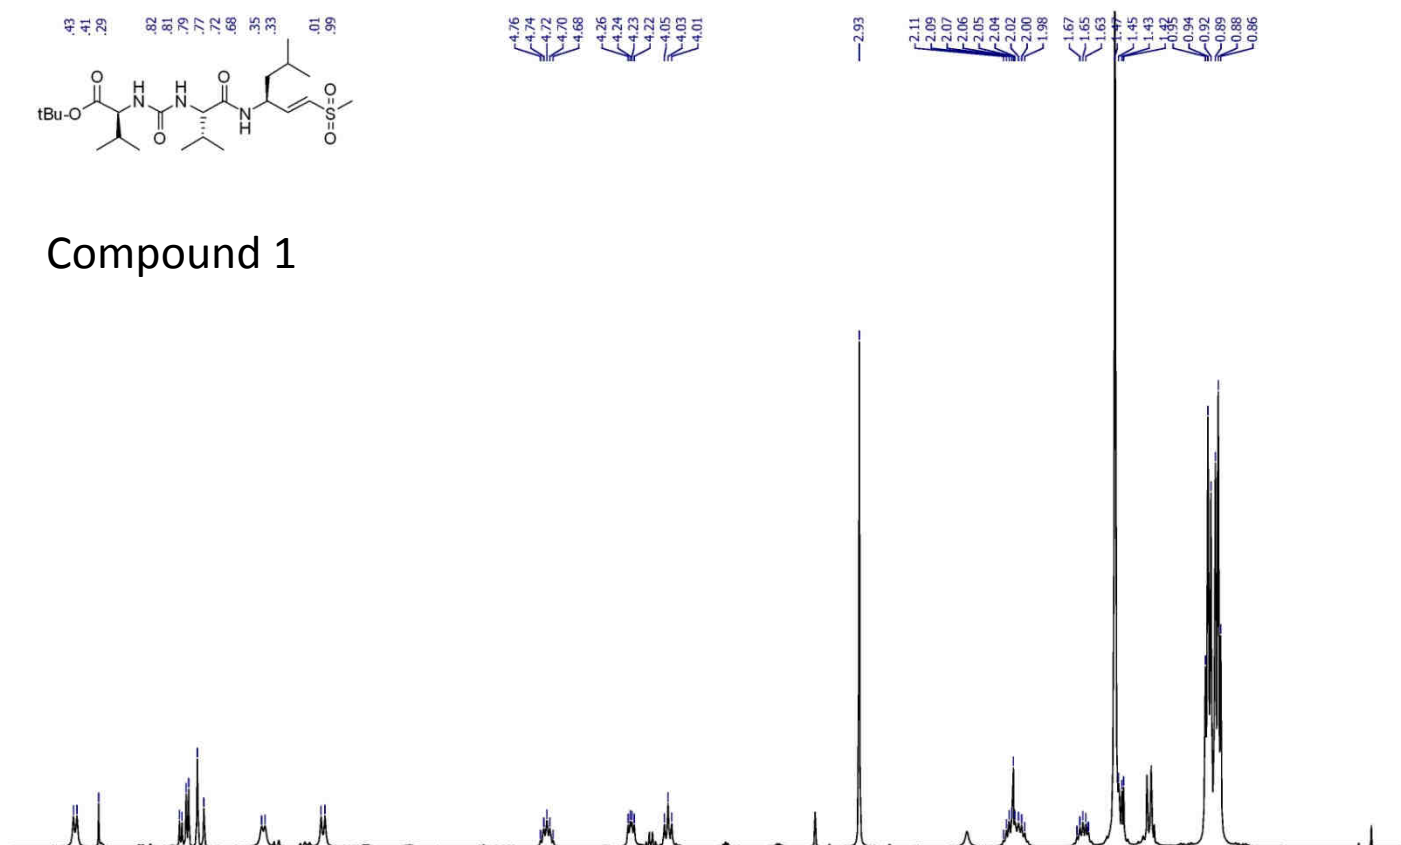

## Compound 1

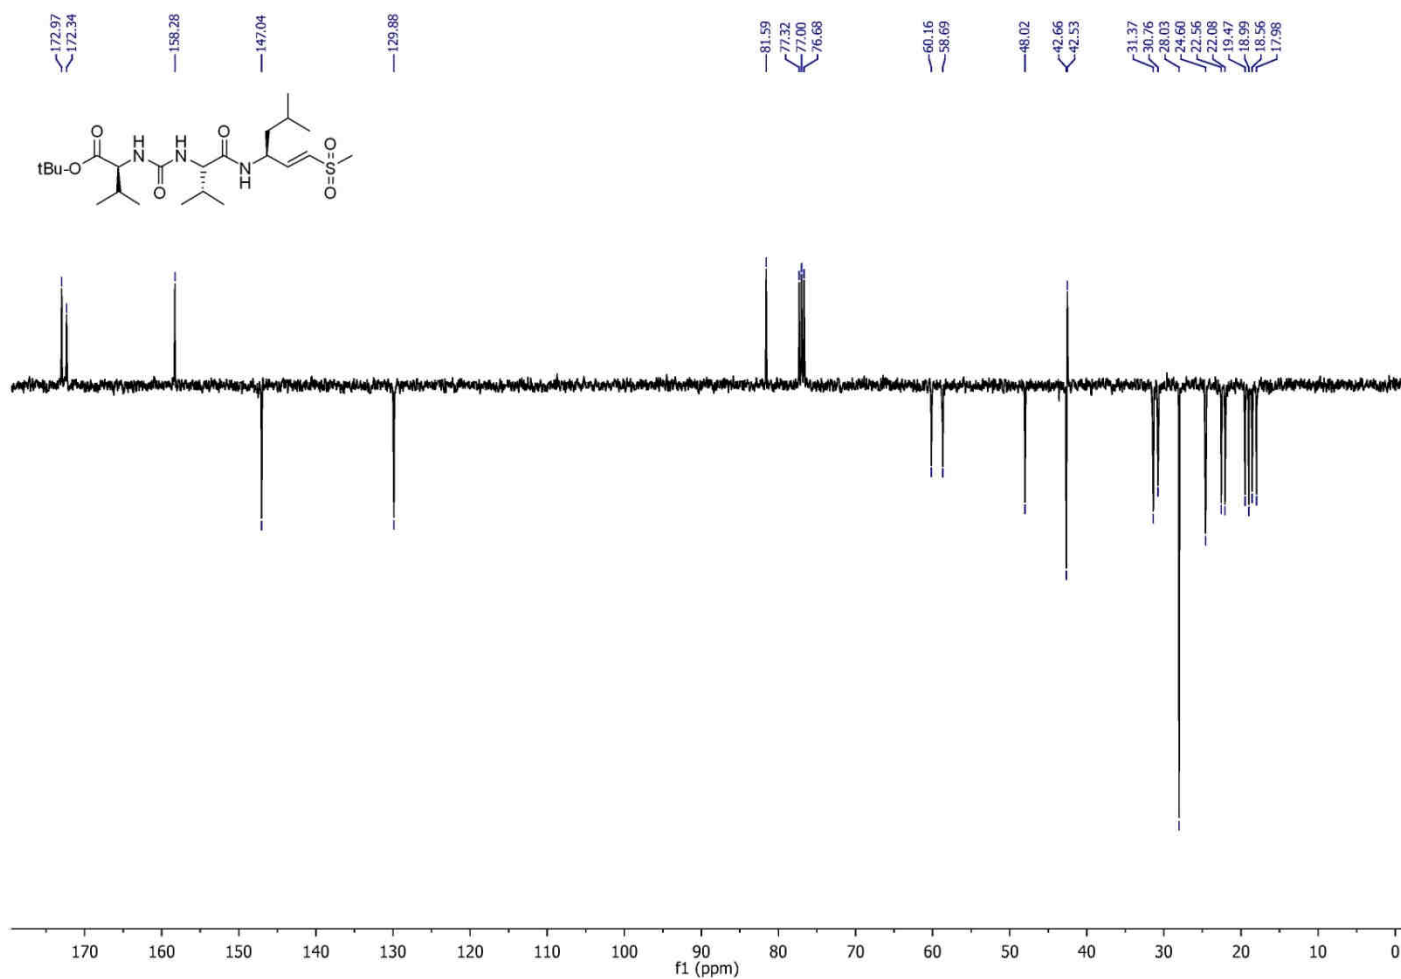



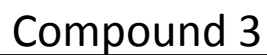

# Compound 4

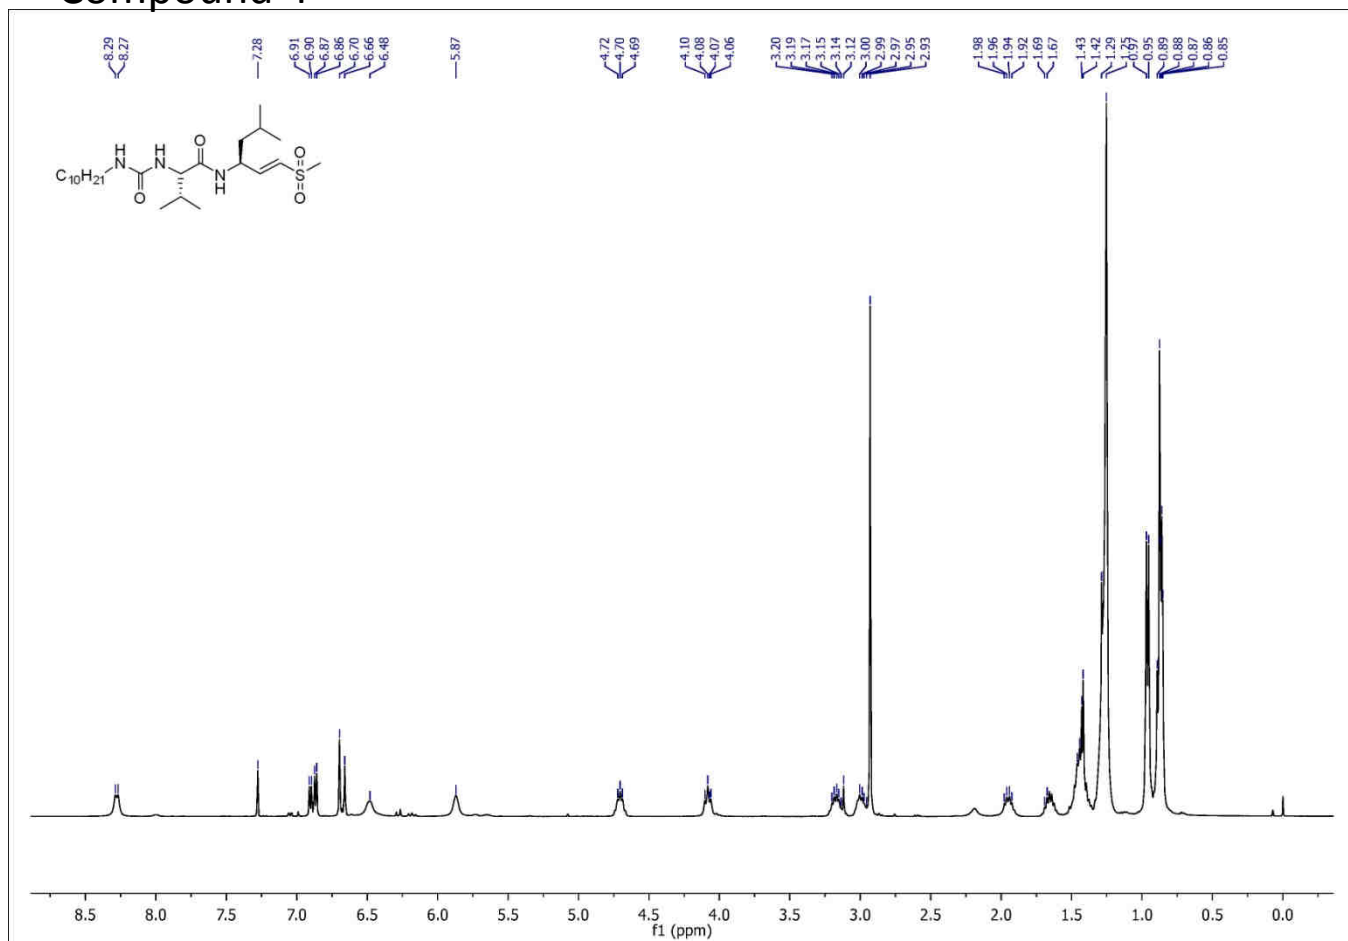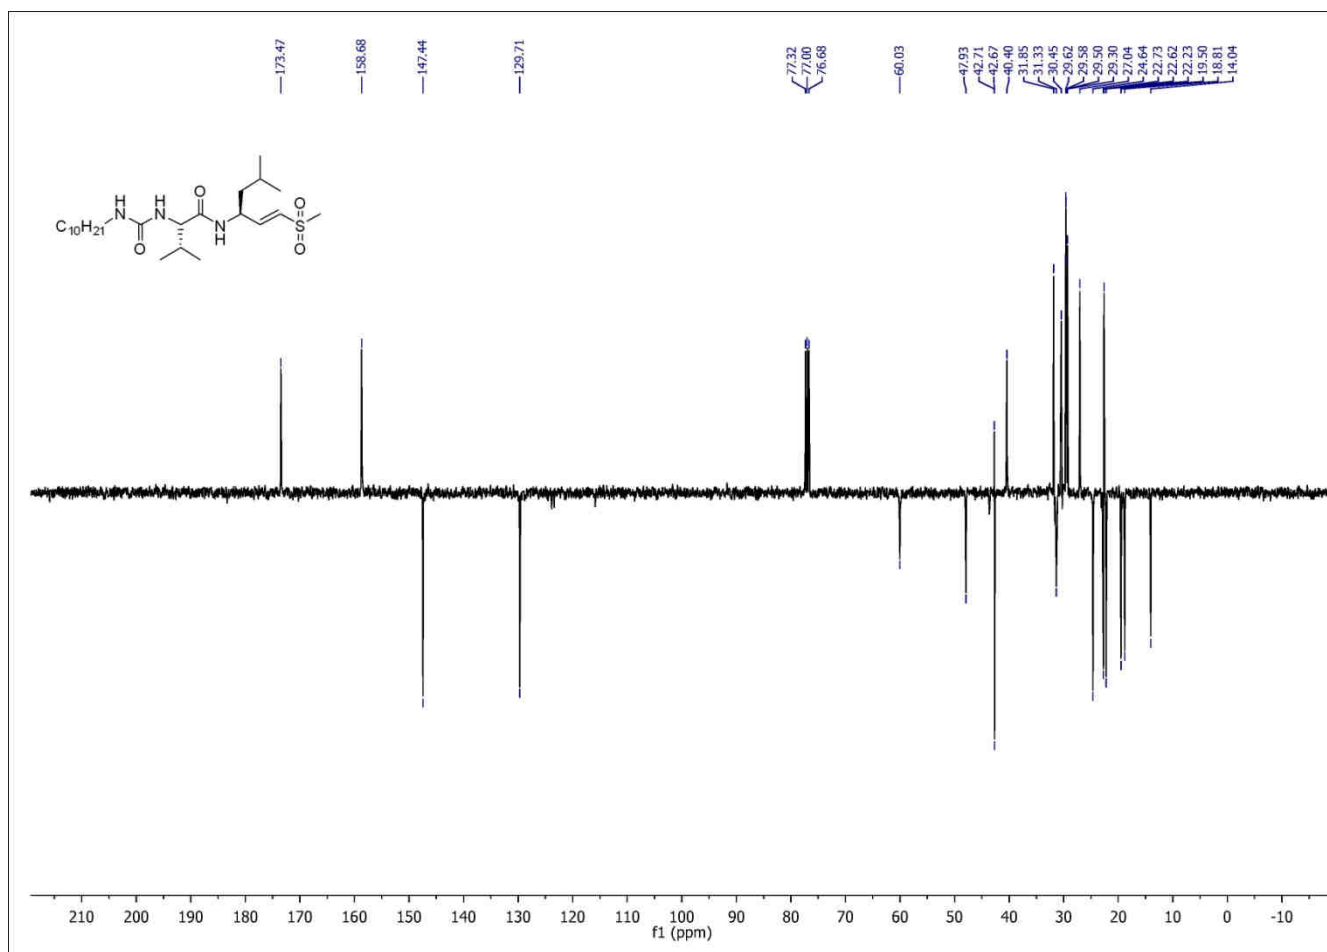



# Compound 6

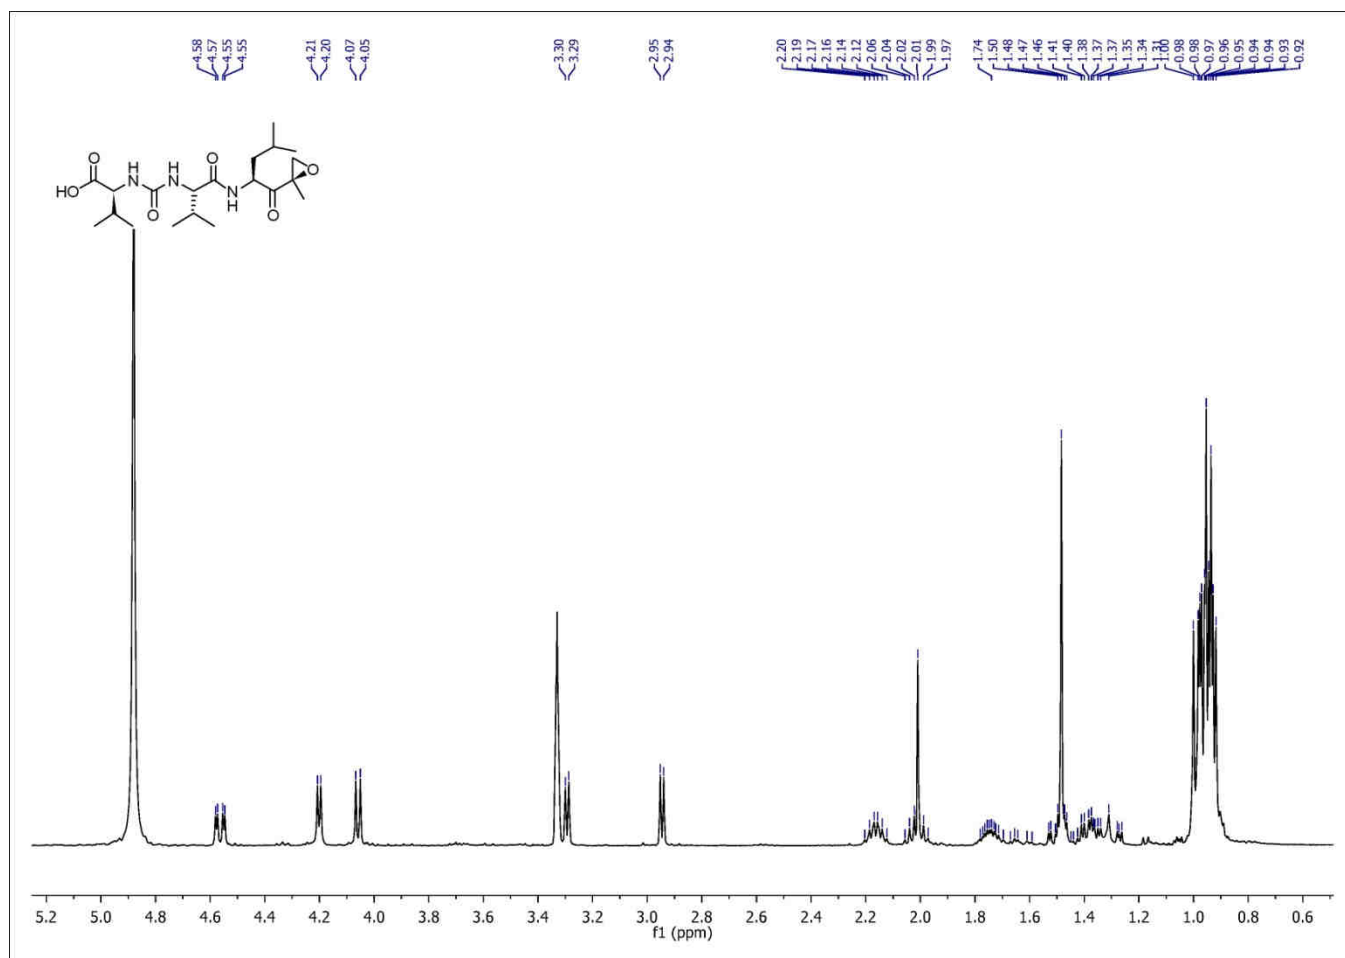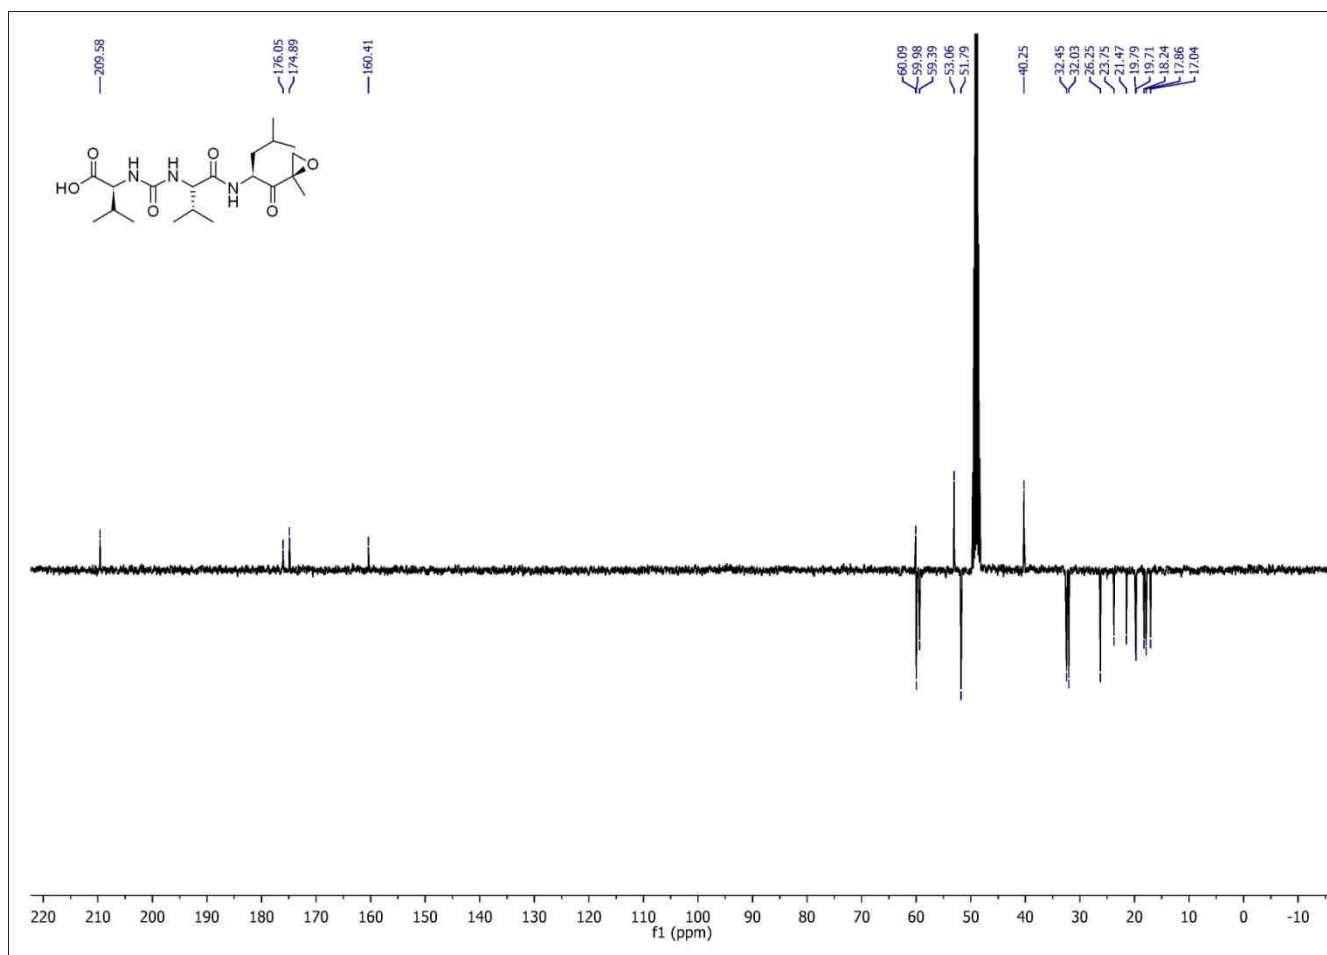

Compound 7

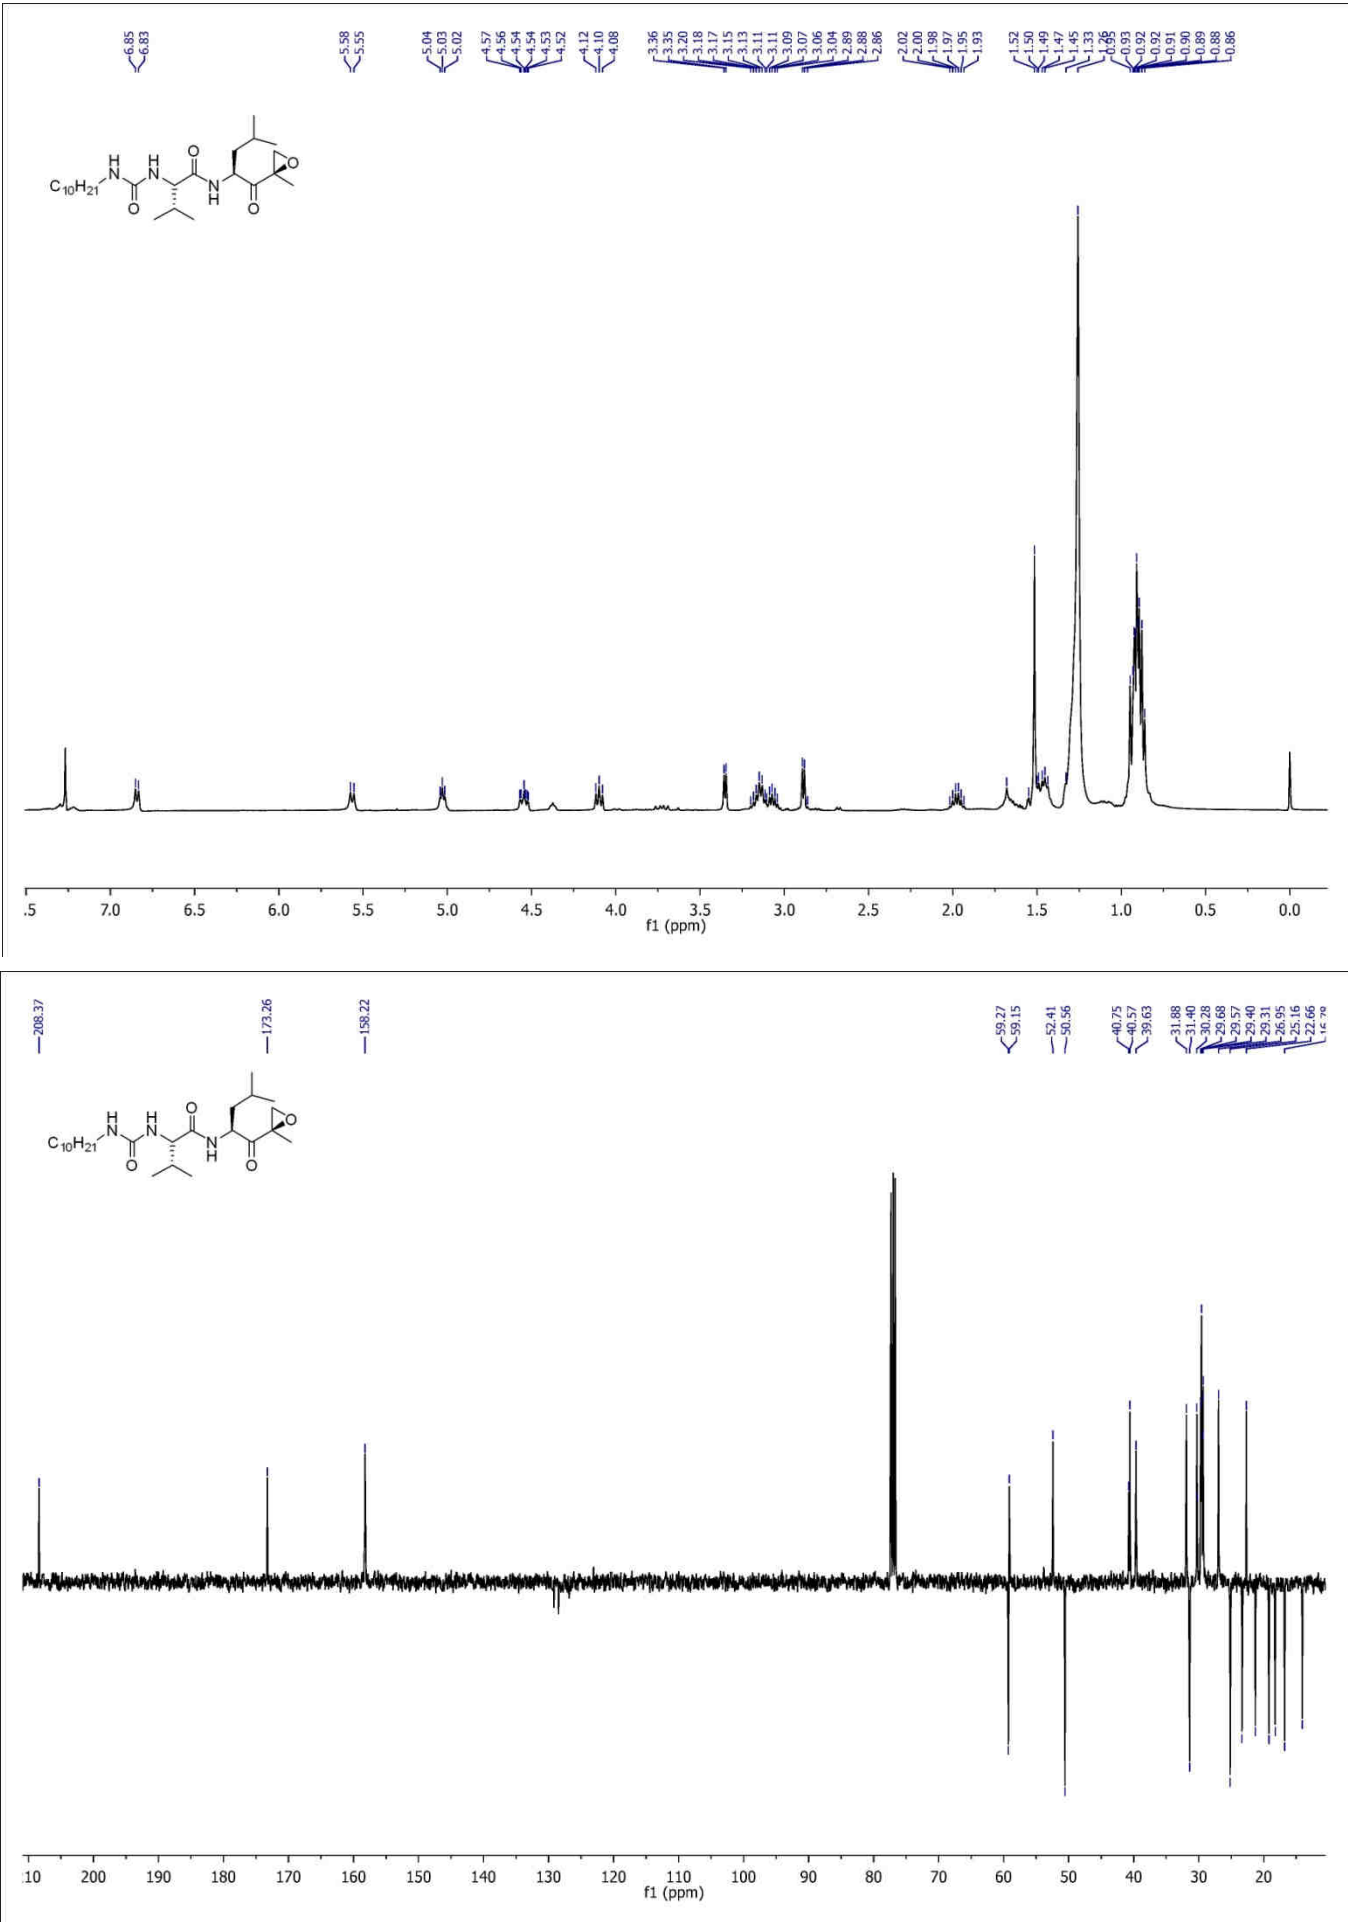



## Compound 8

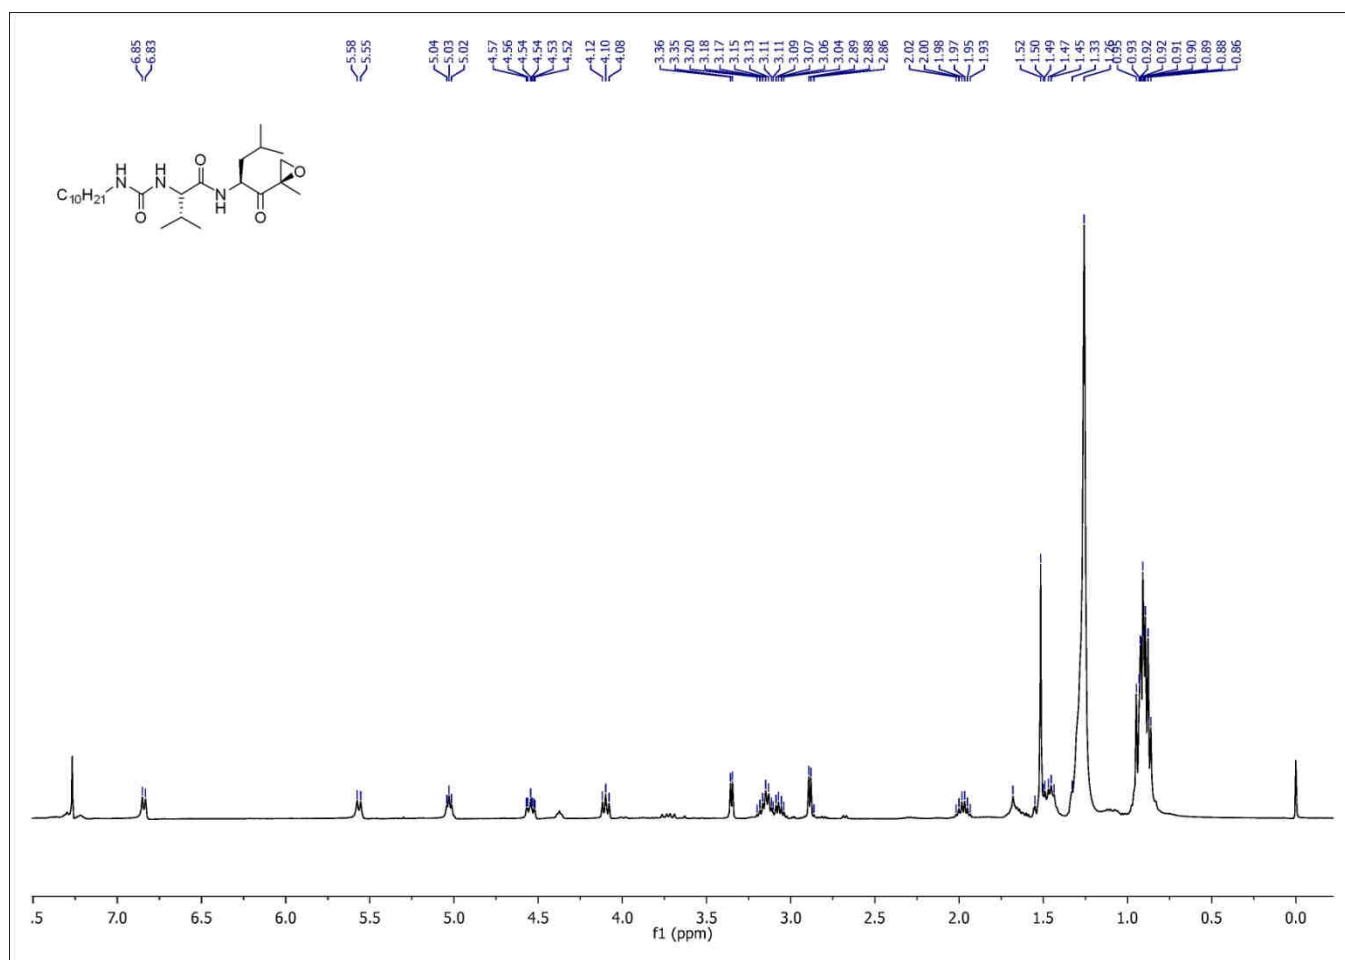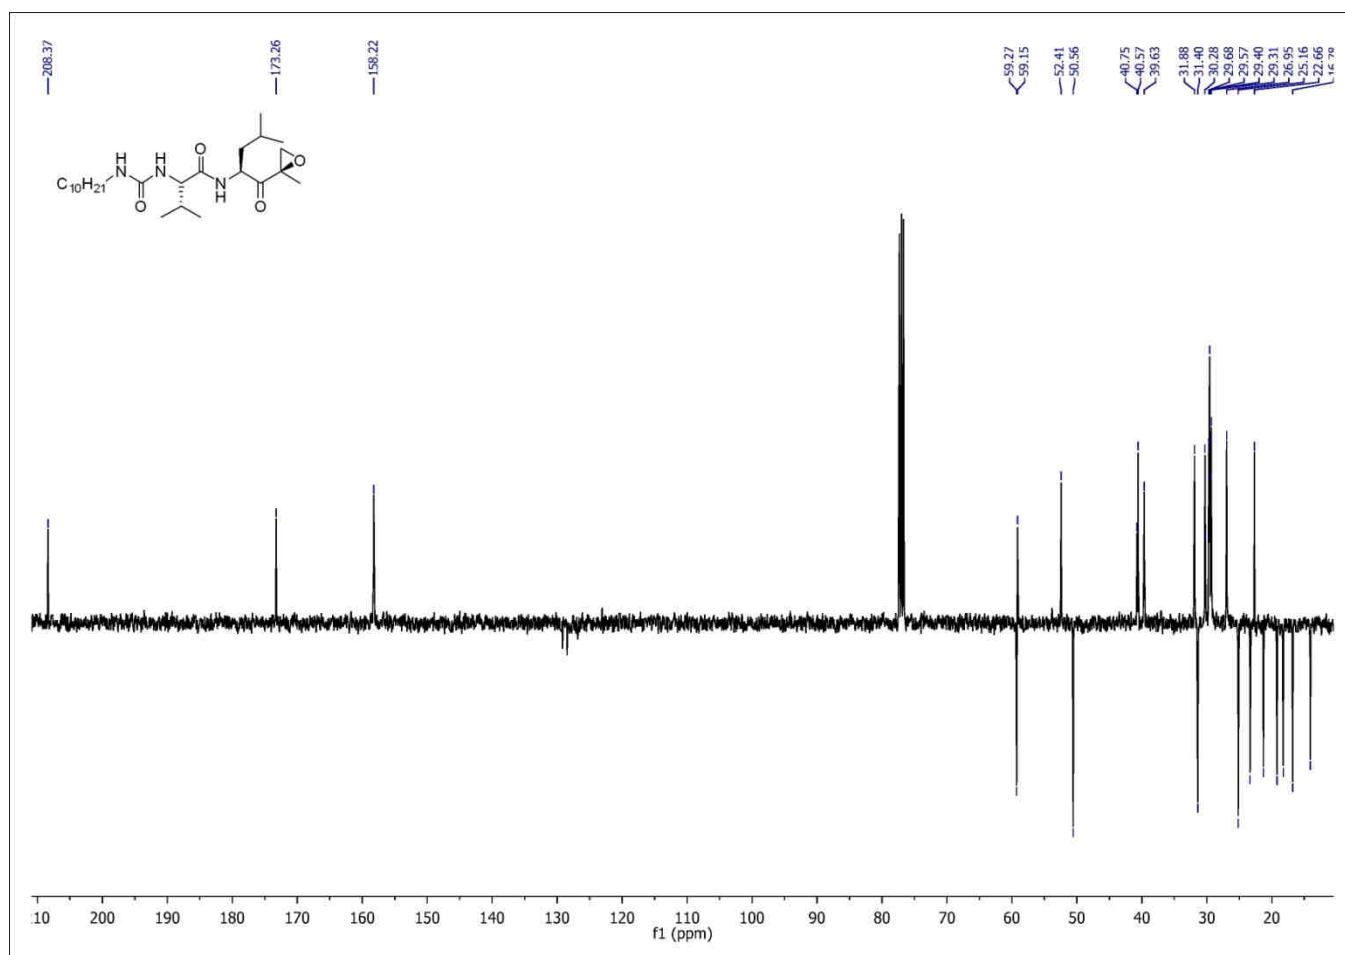





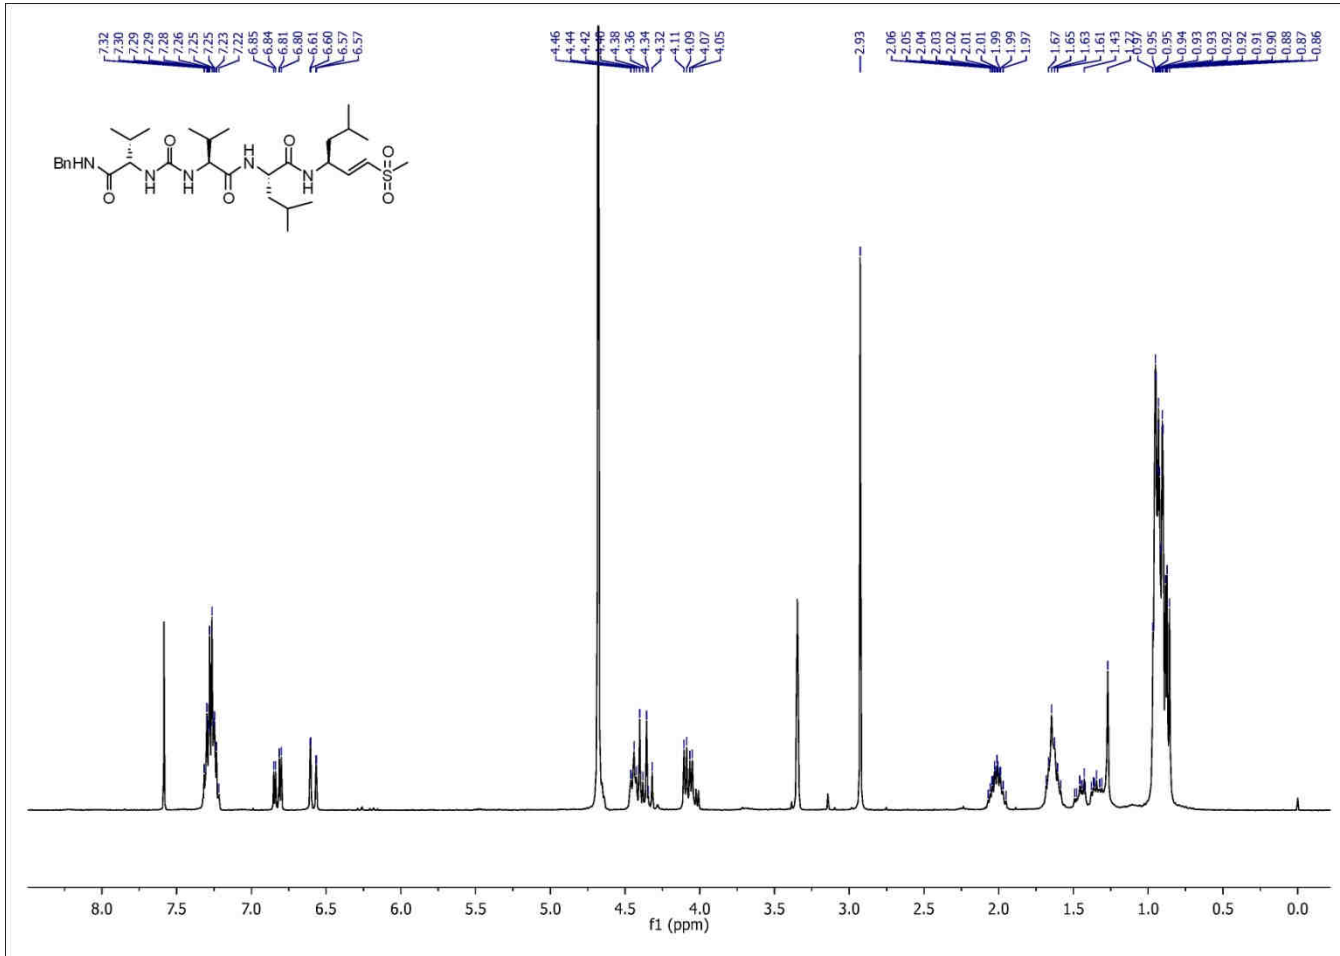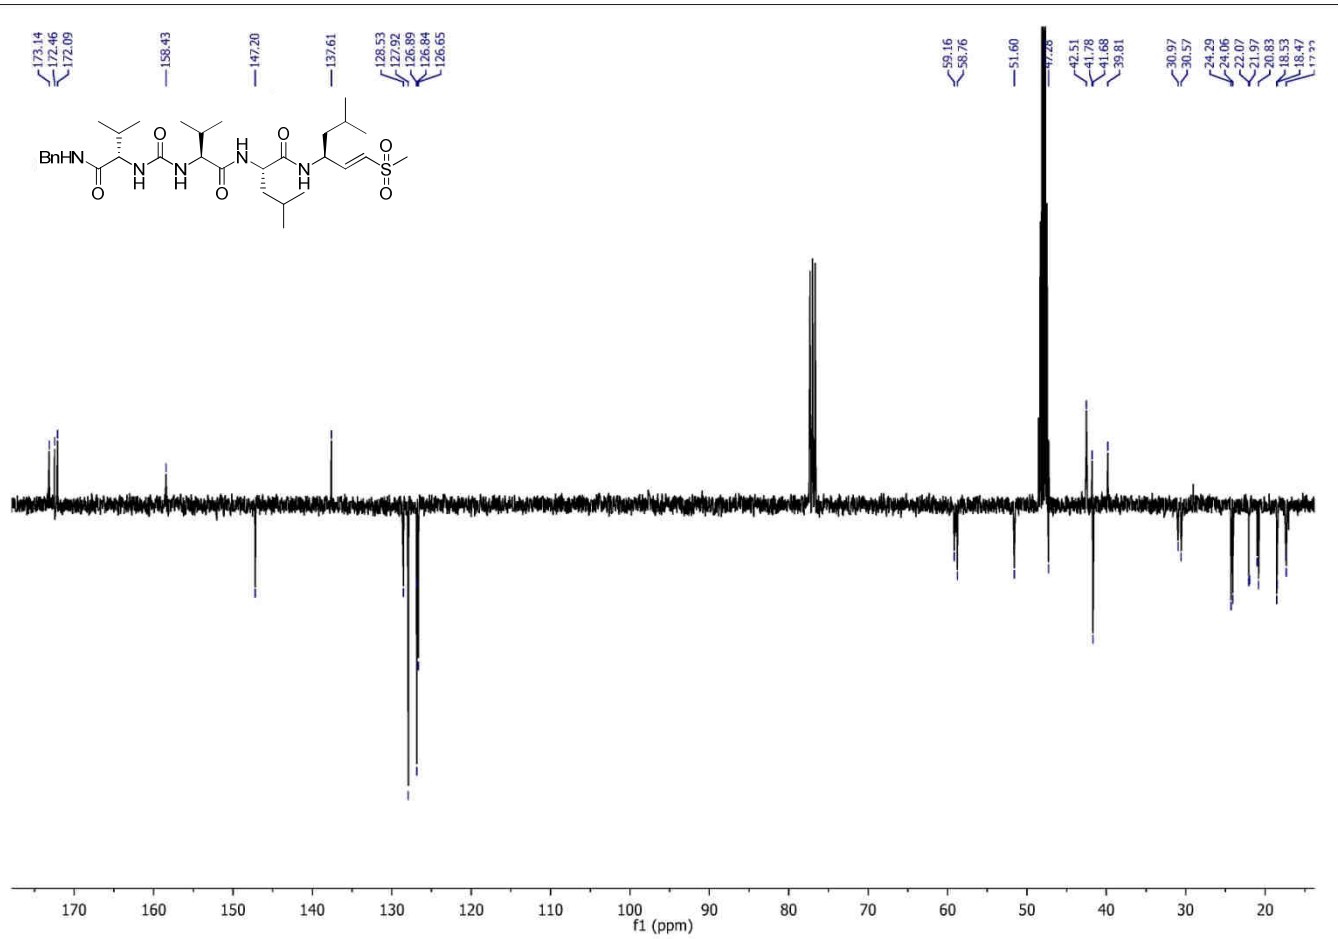

# Compound 12

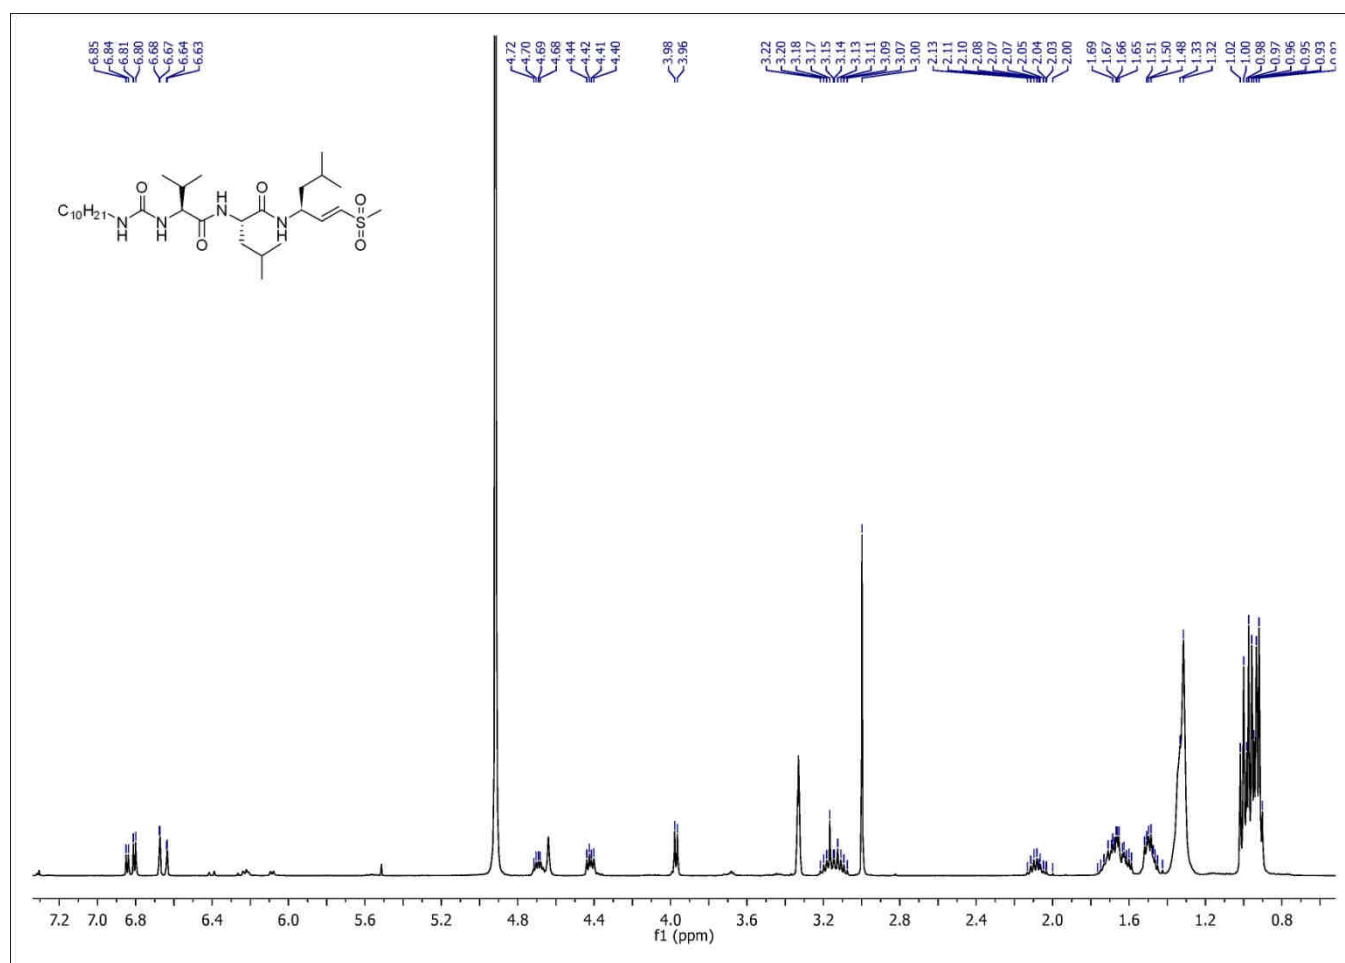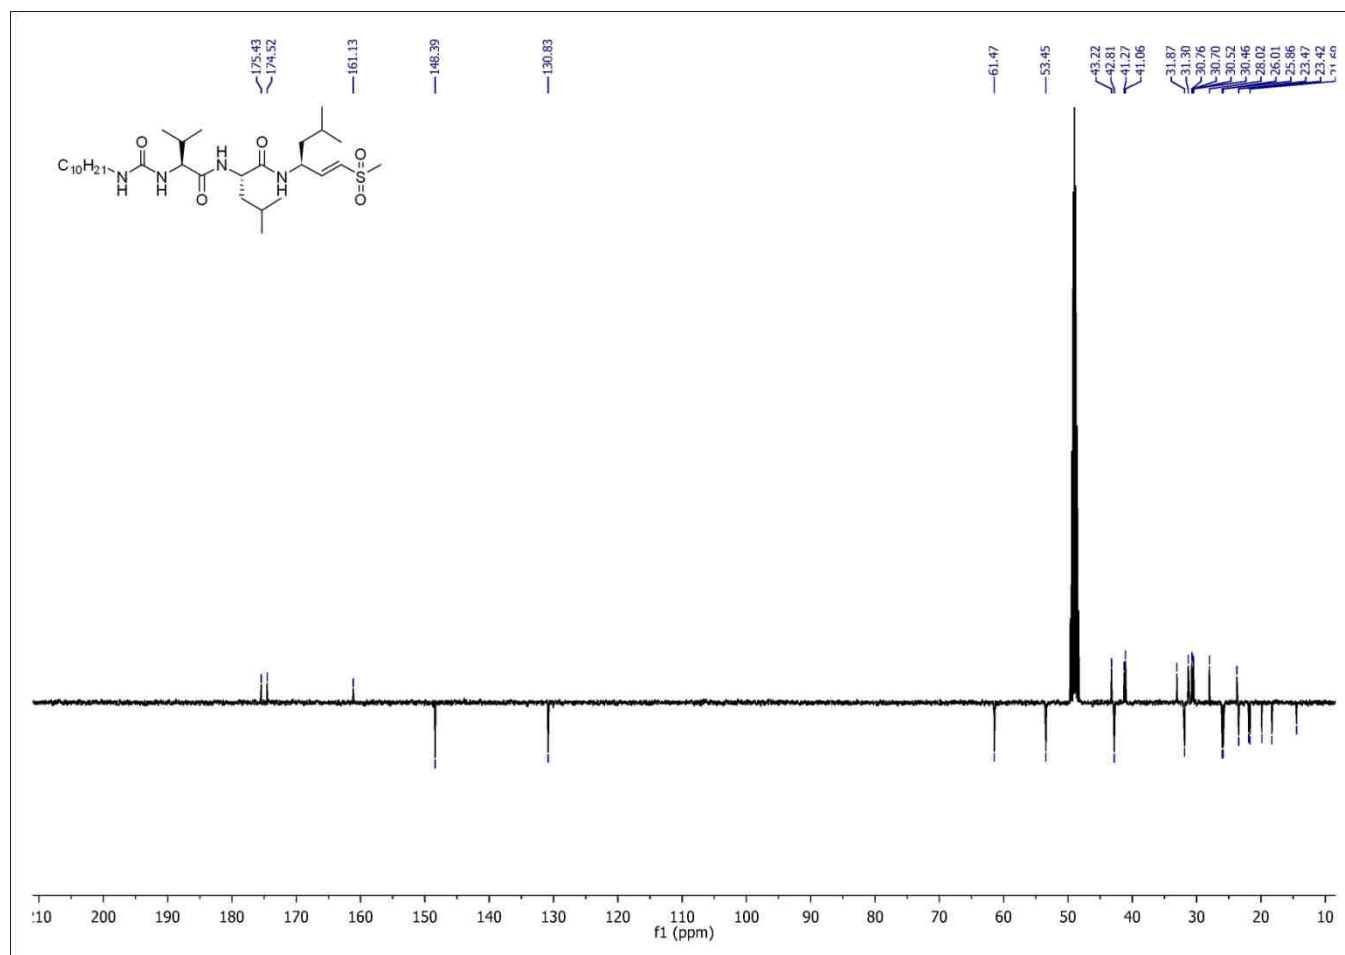

Compound 13

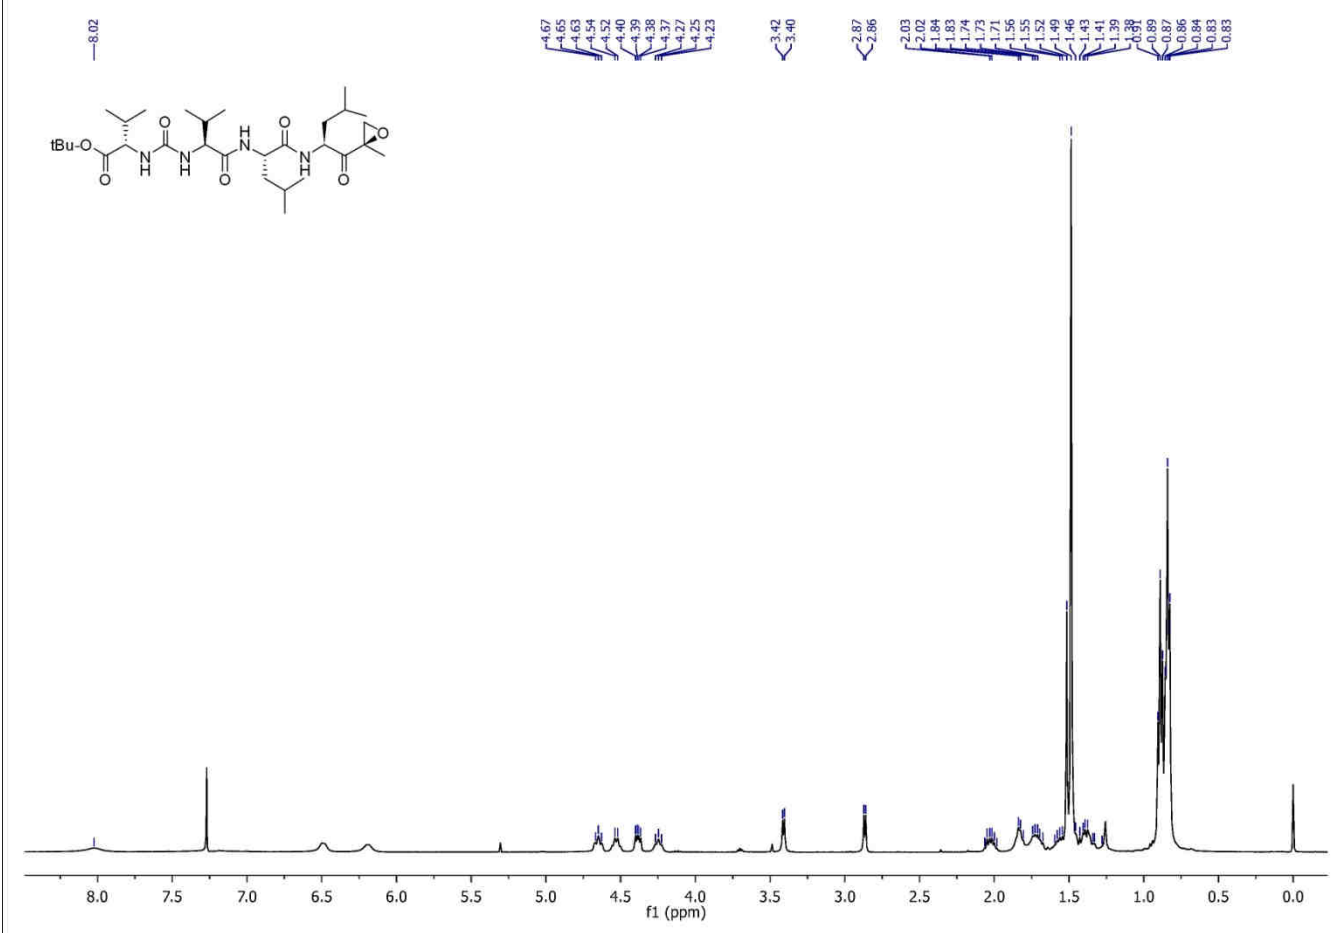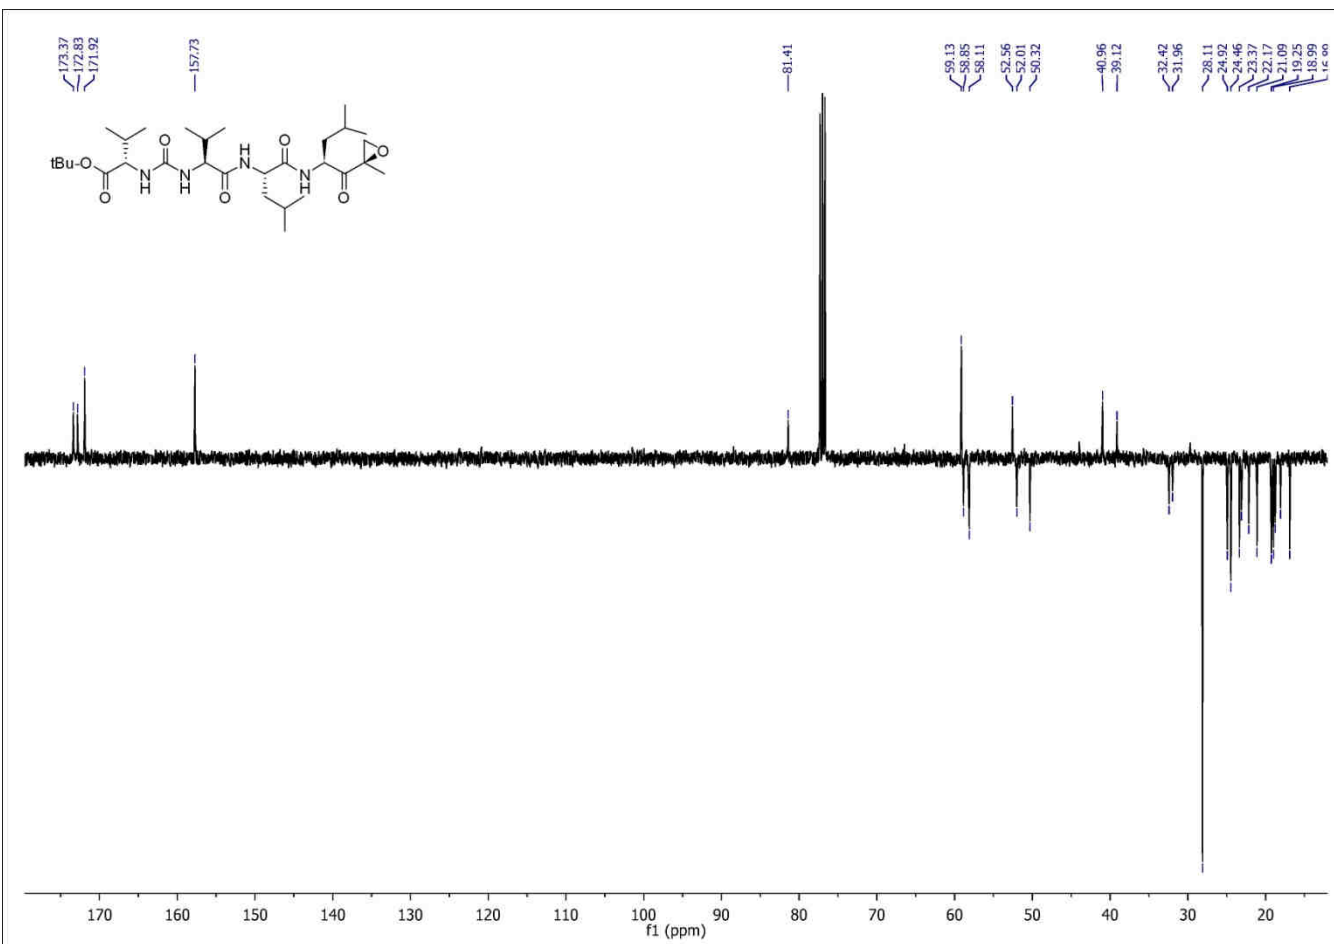

# Compound 14

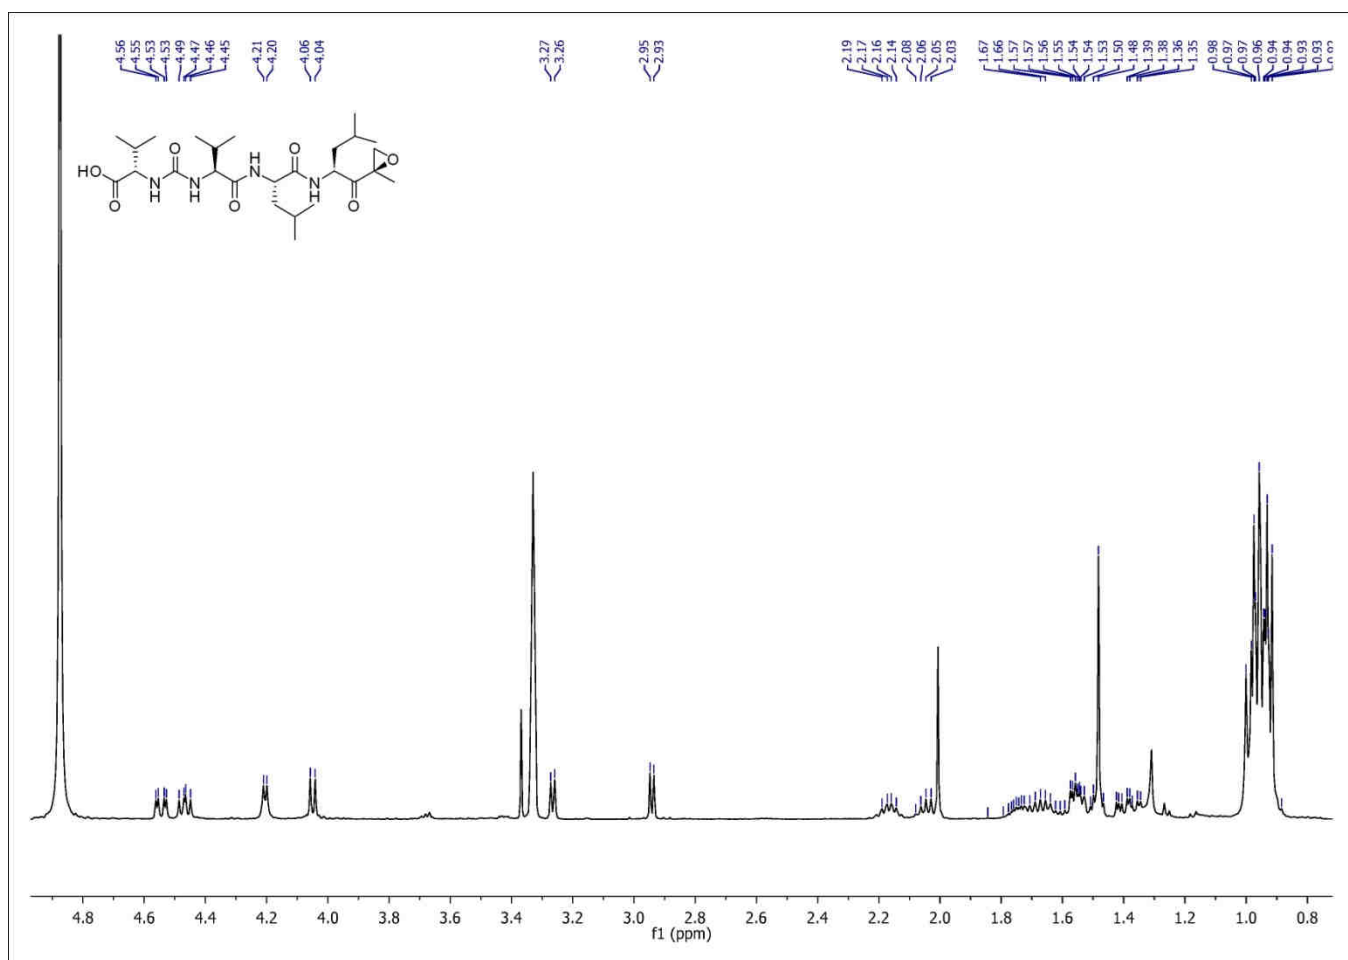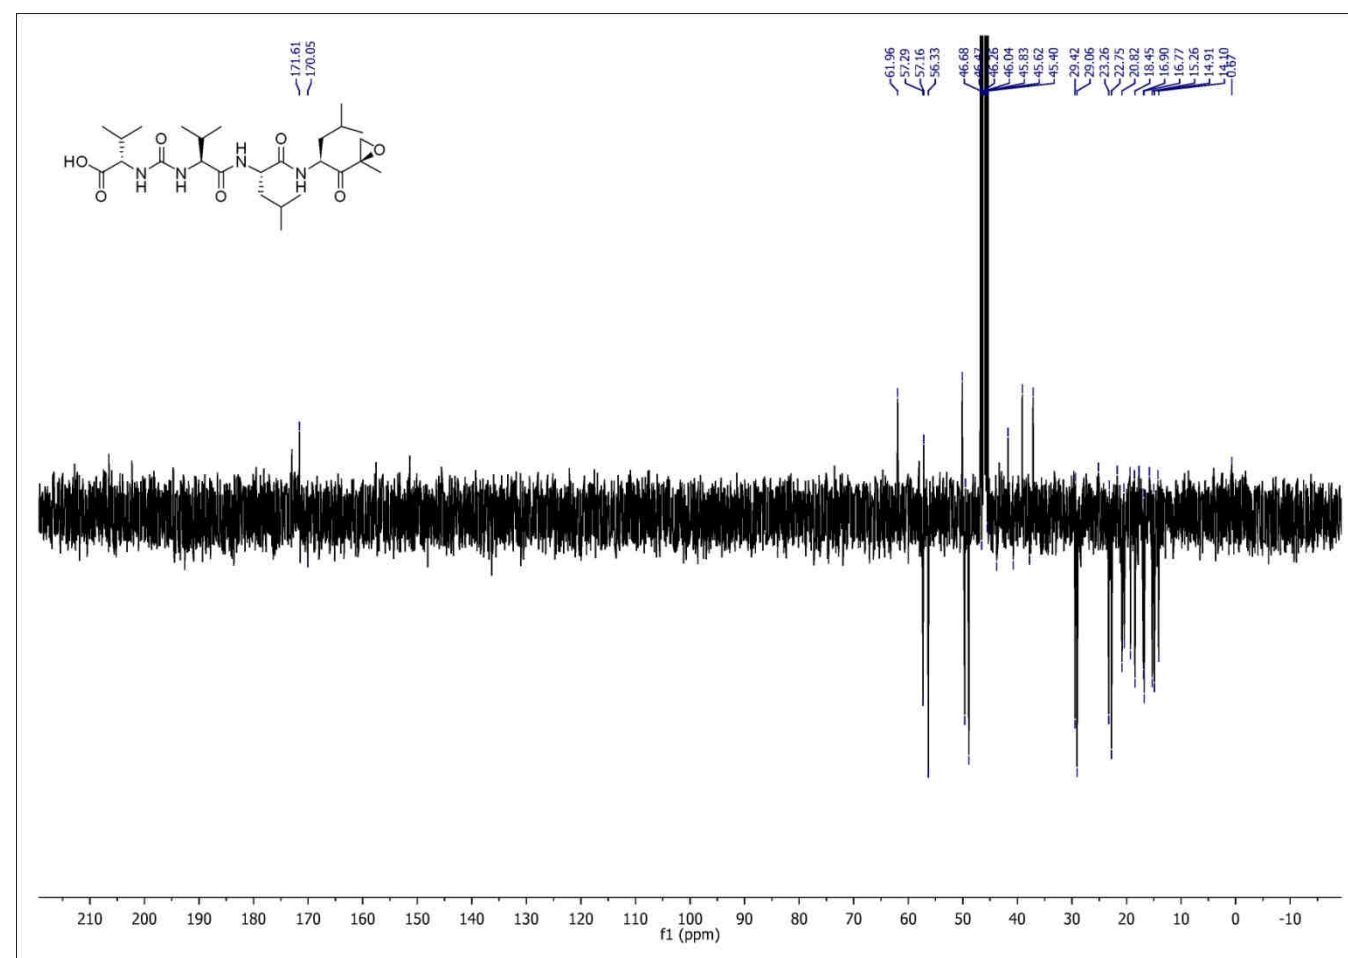

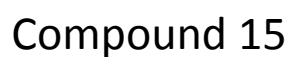



# Compound 16

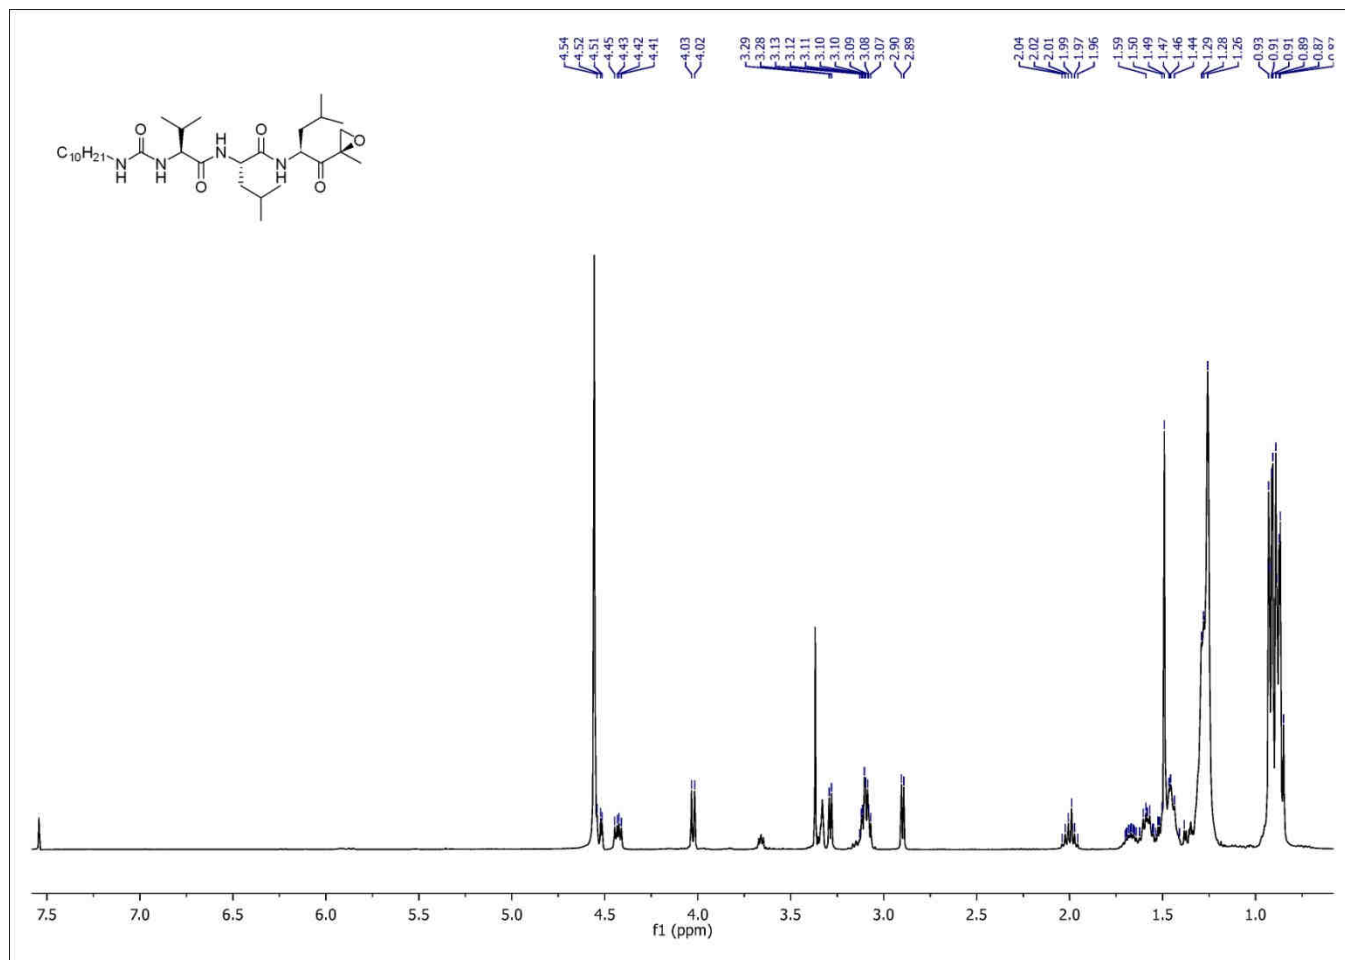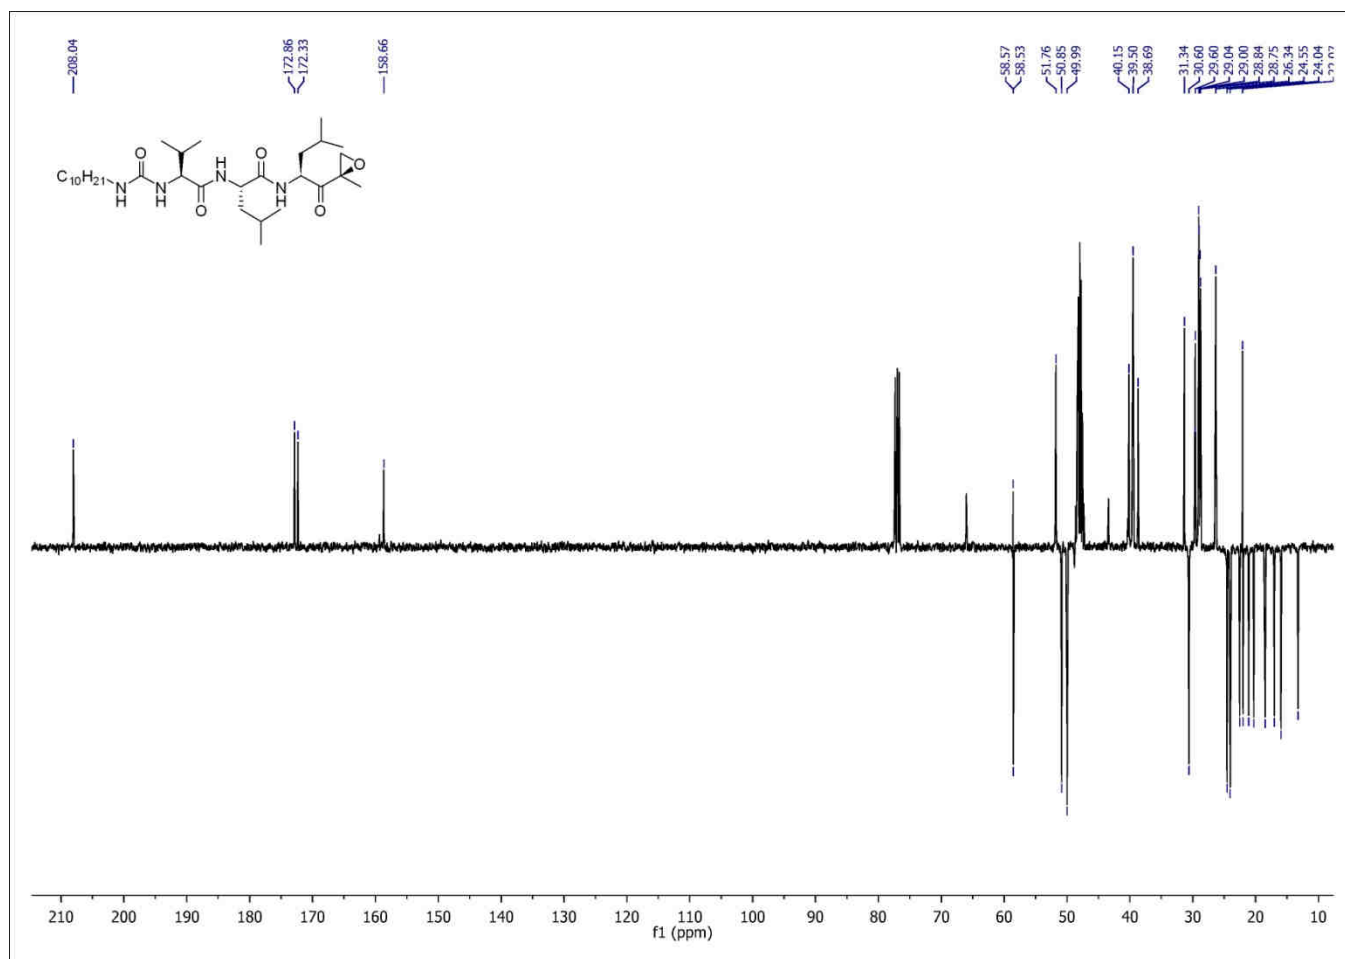

# Compound 17

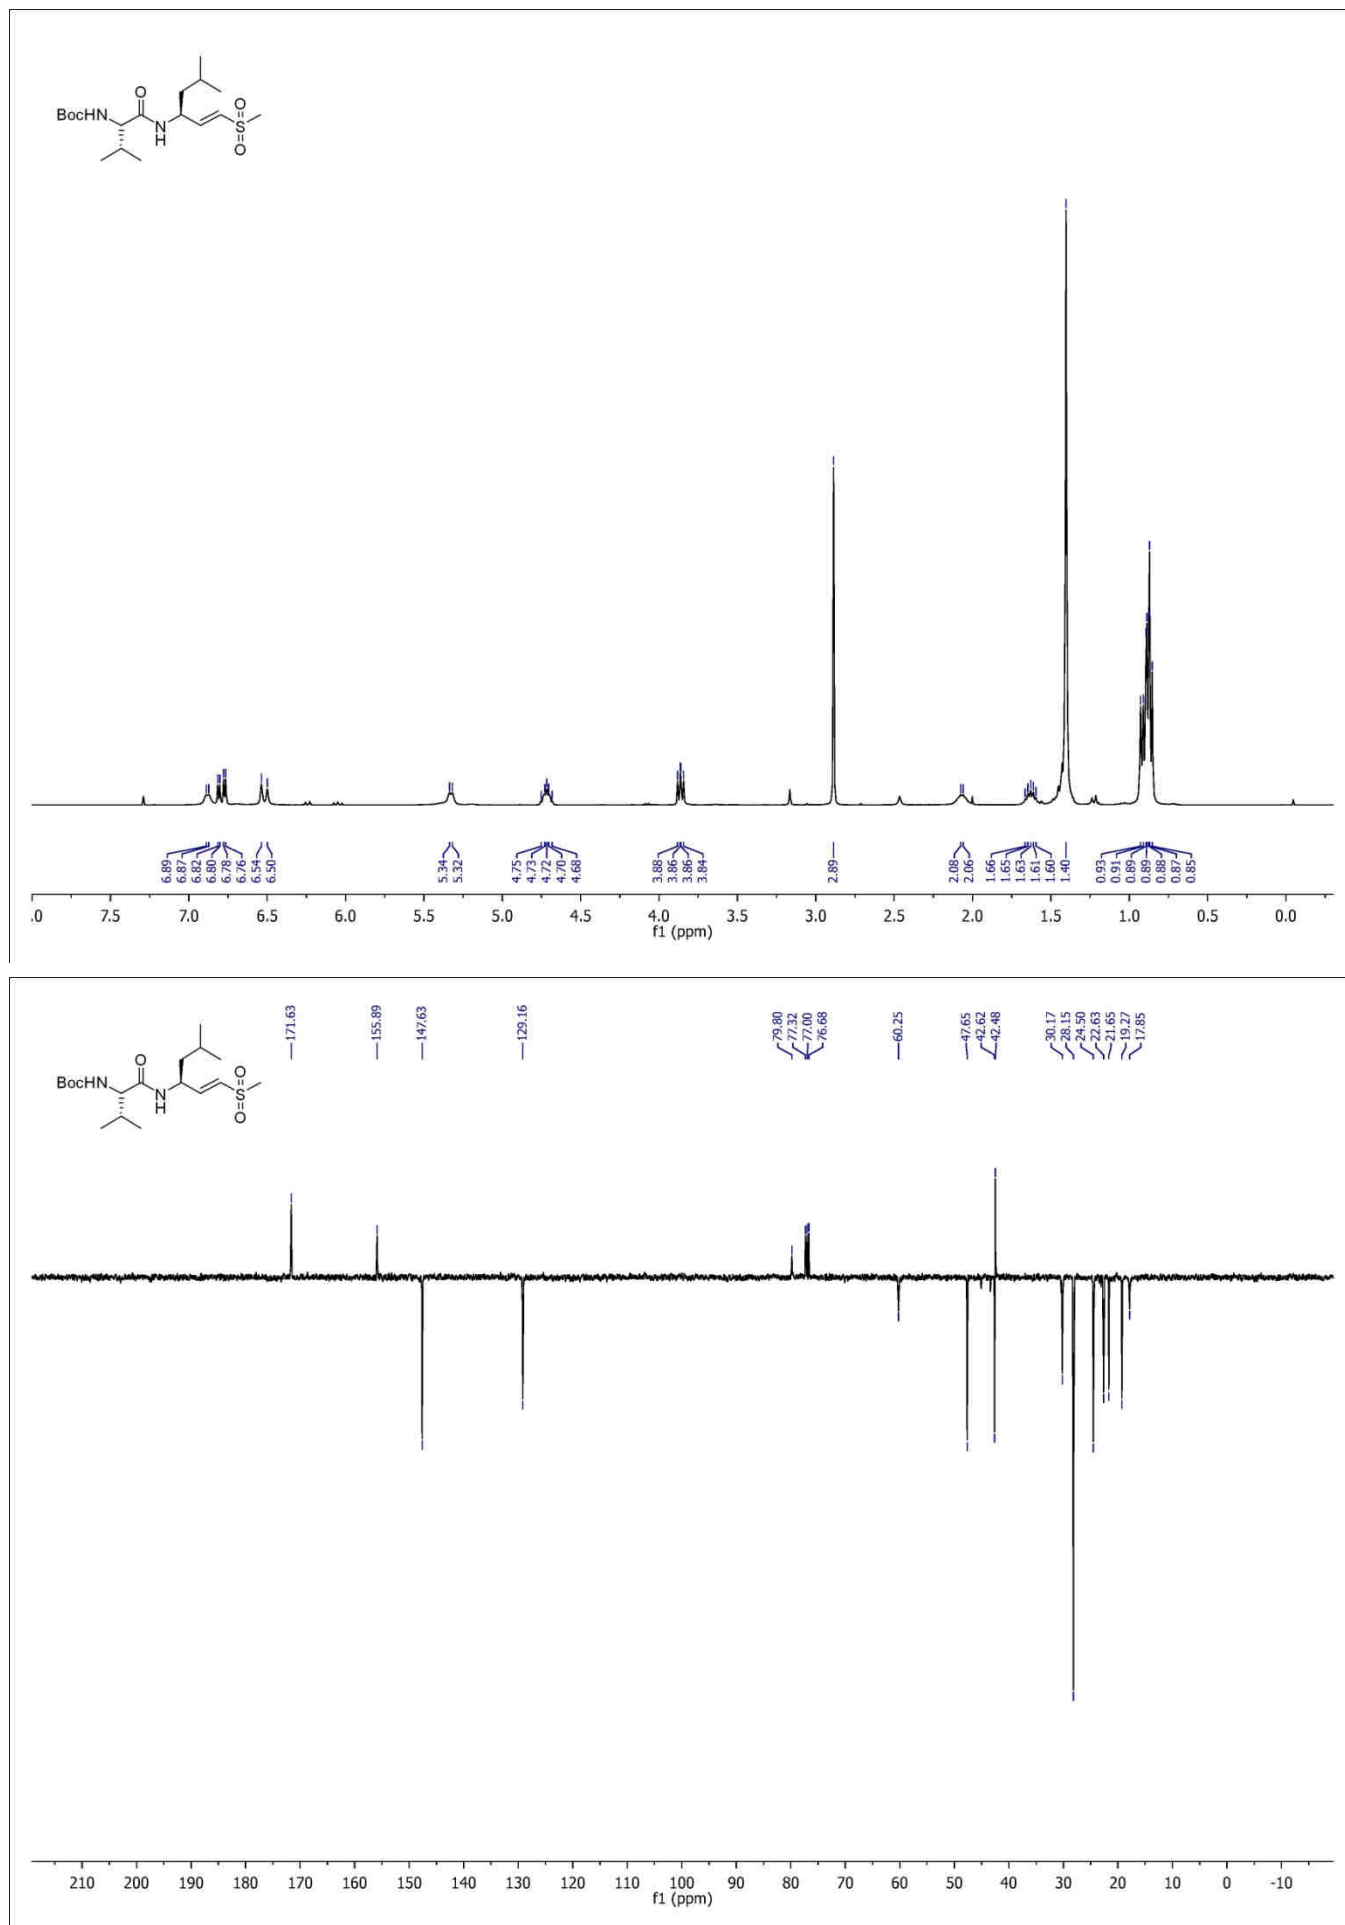

## Compound 20

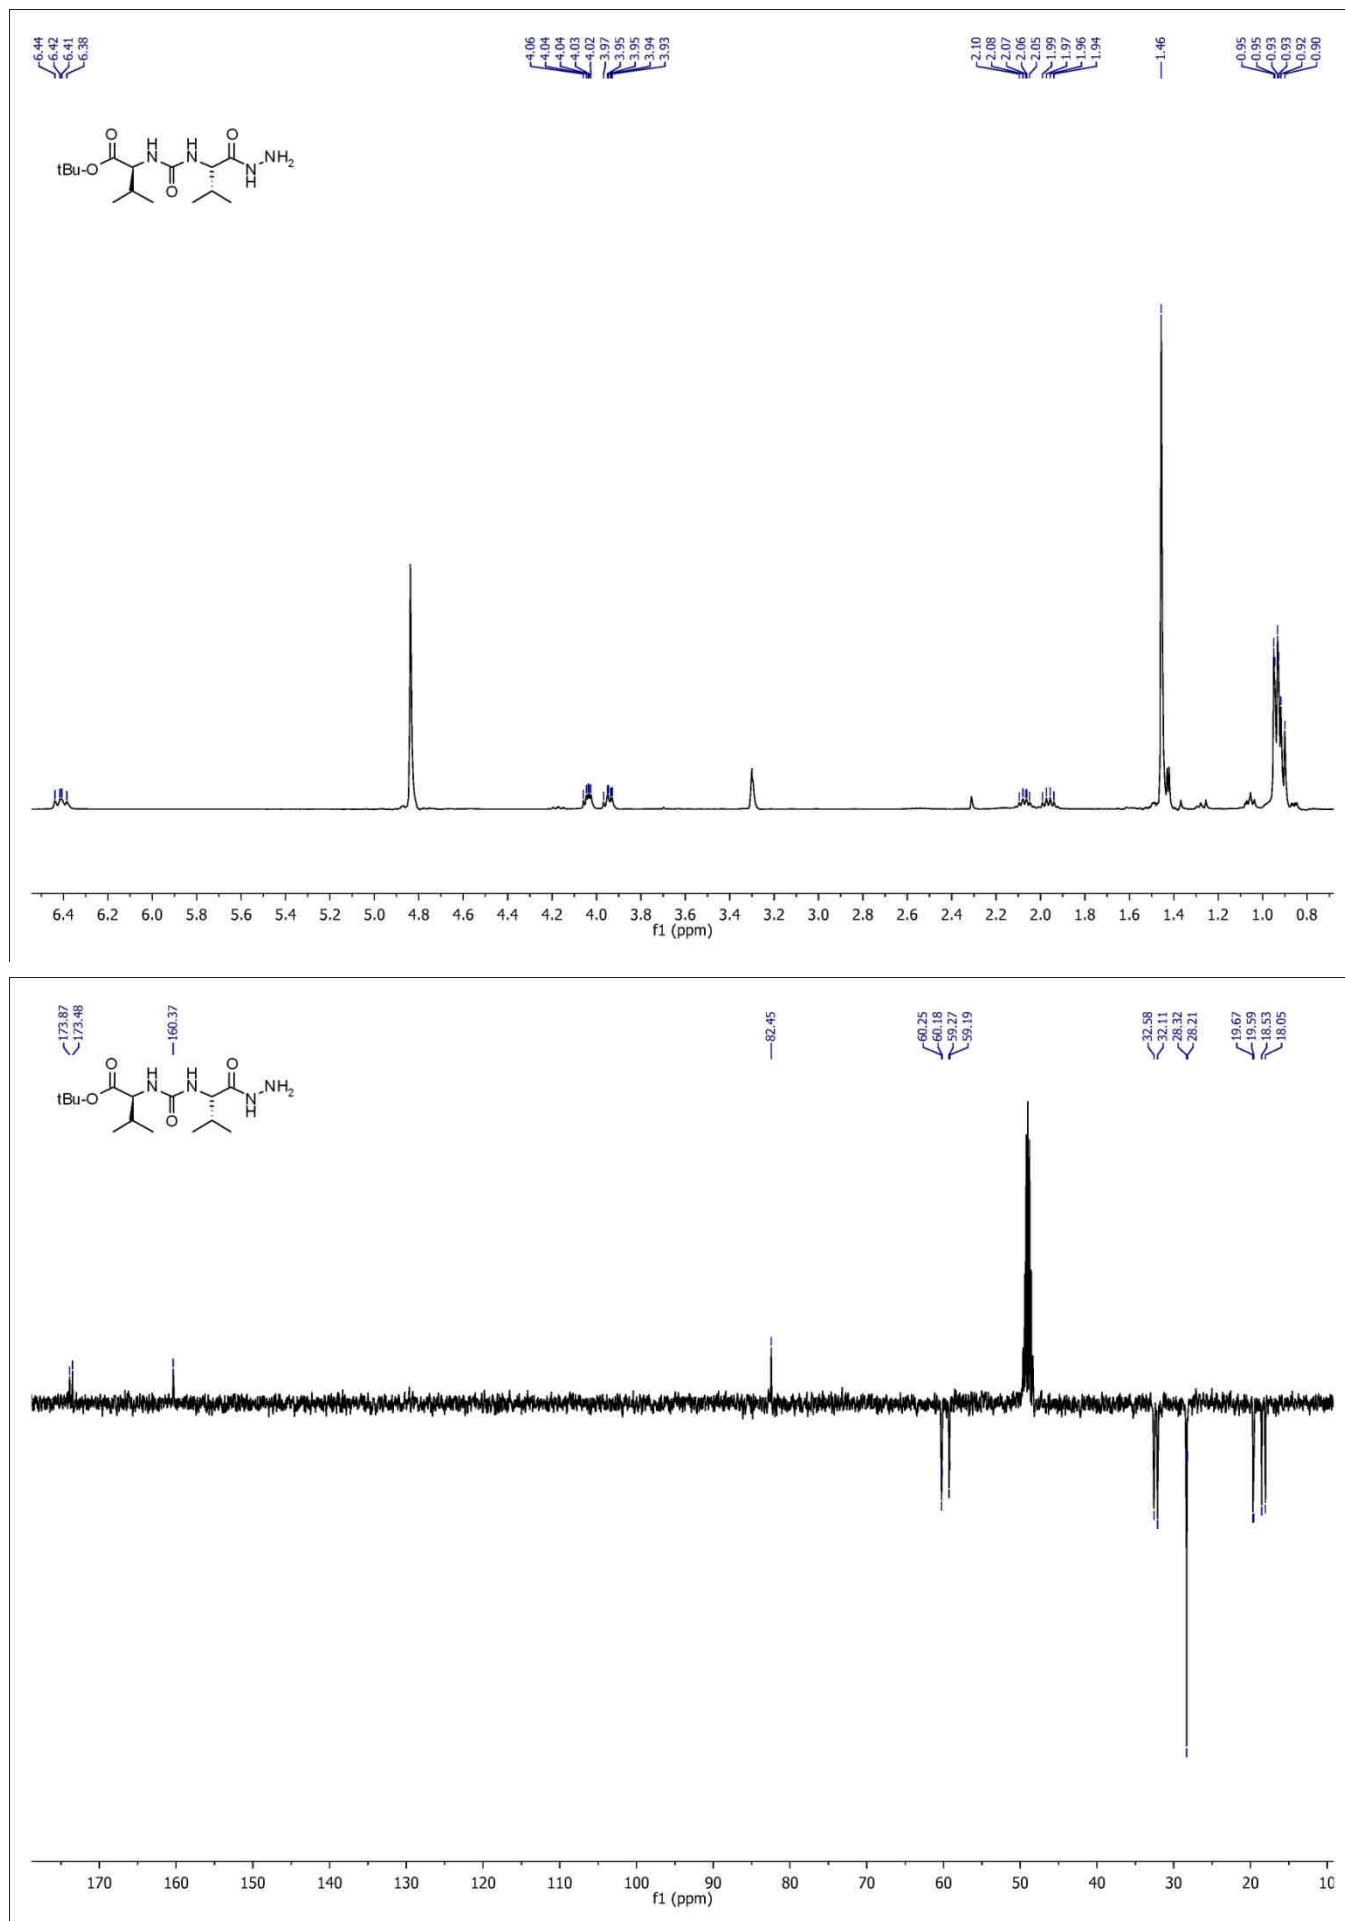

# Compound 22

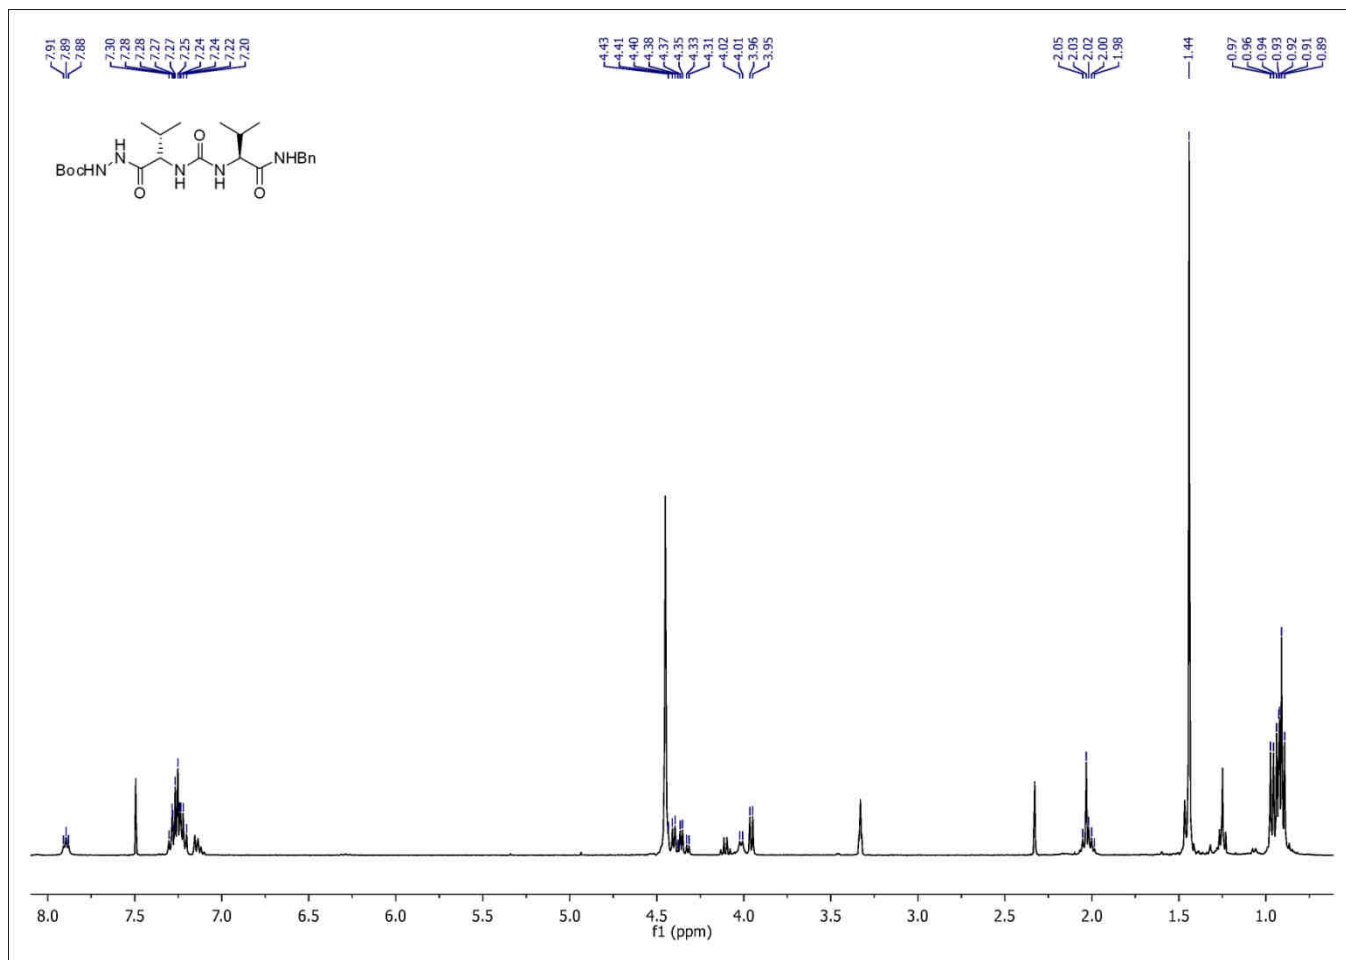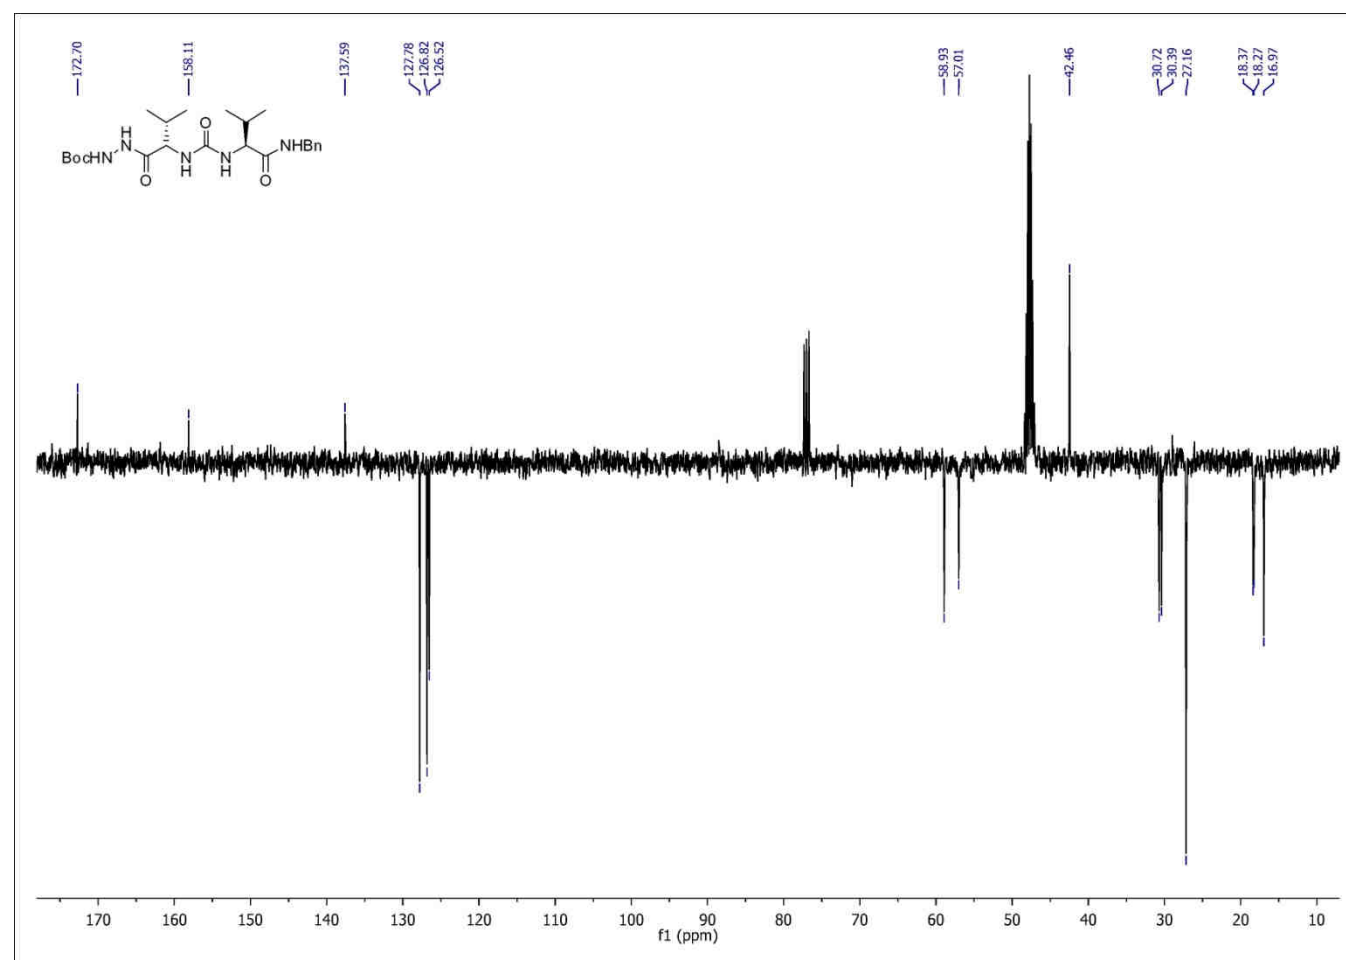

Compound 23

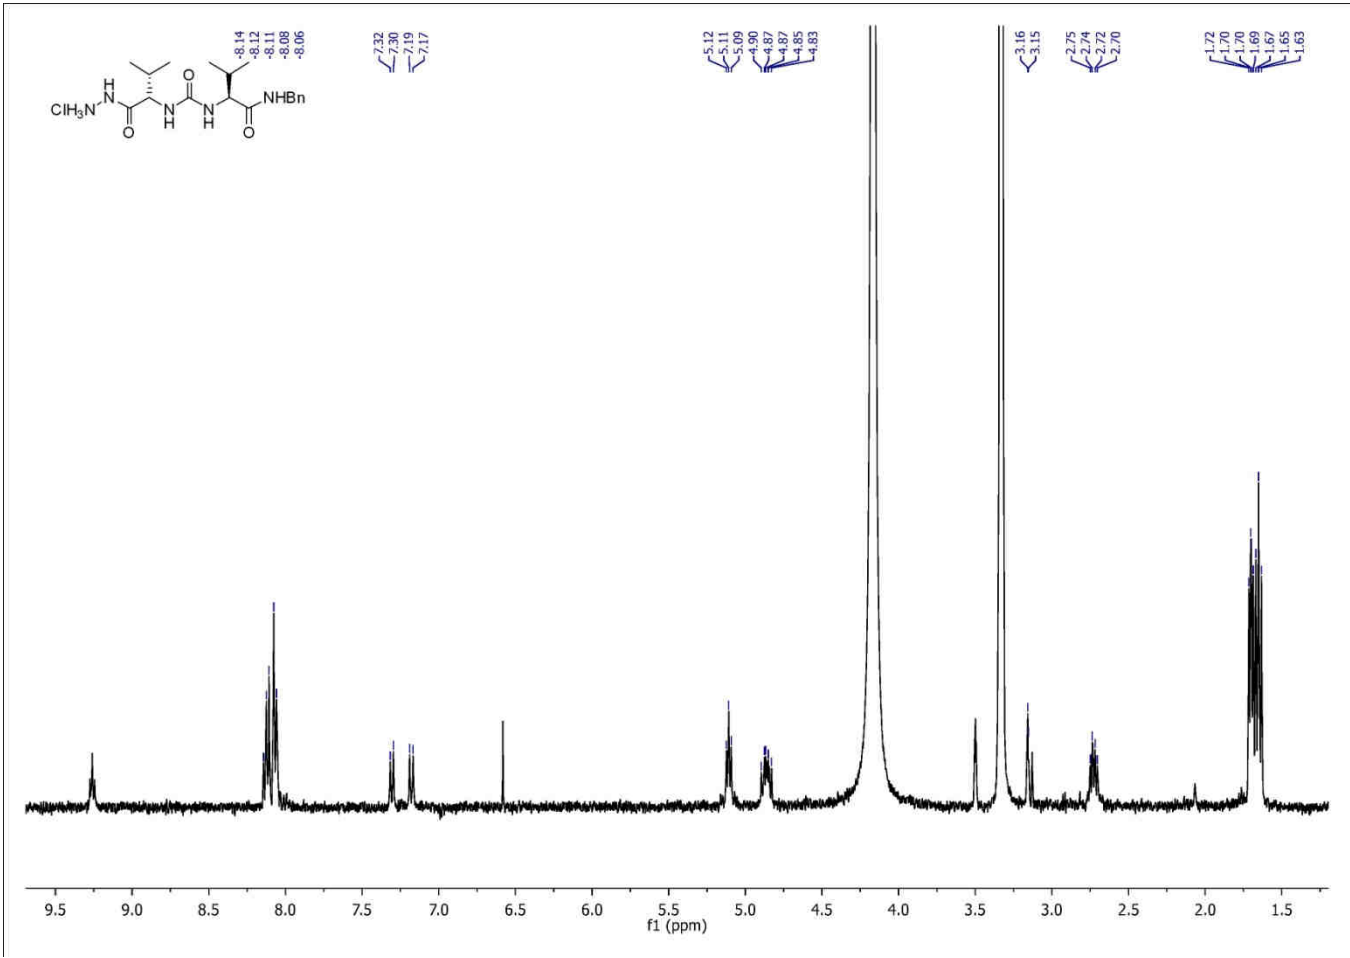

## Compound 24

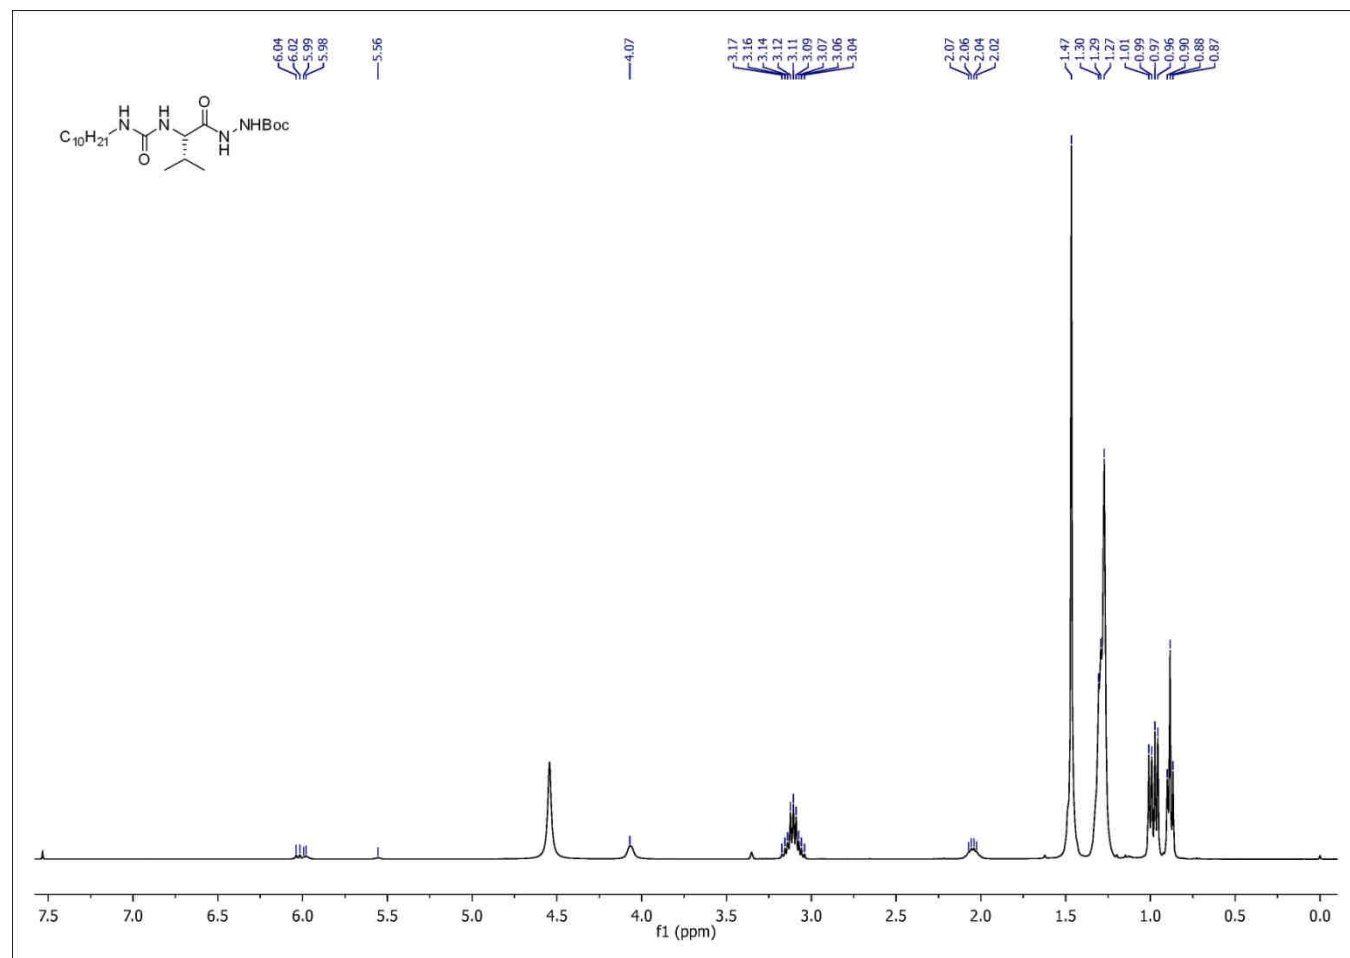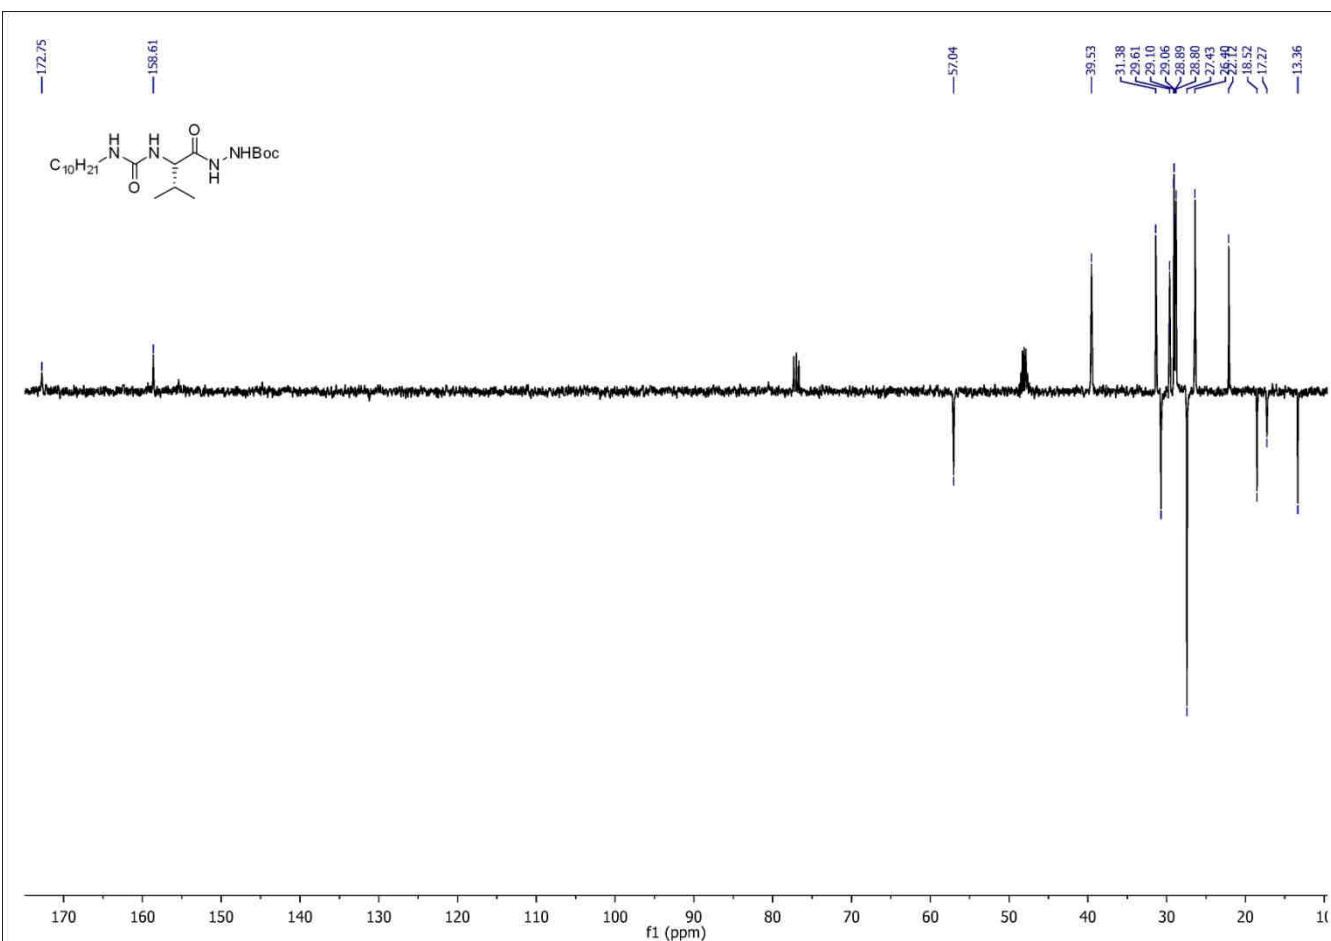

Compound 25

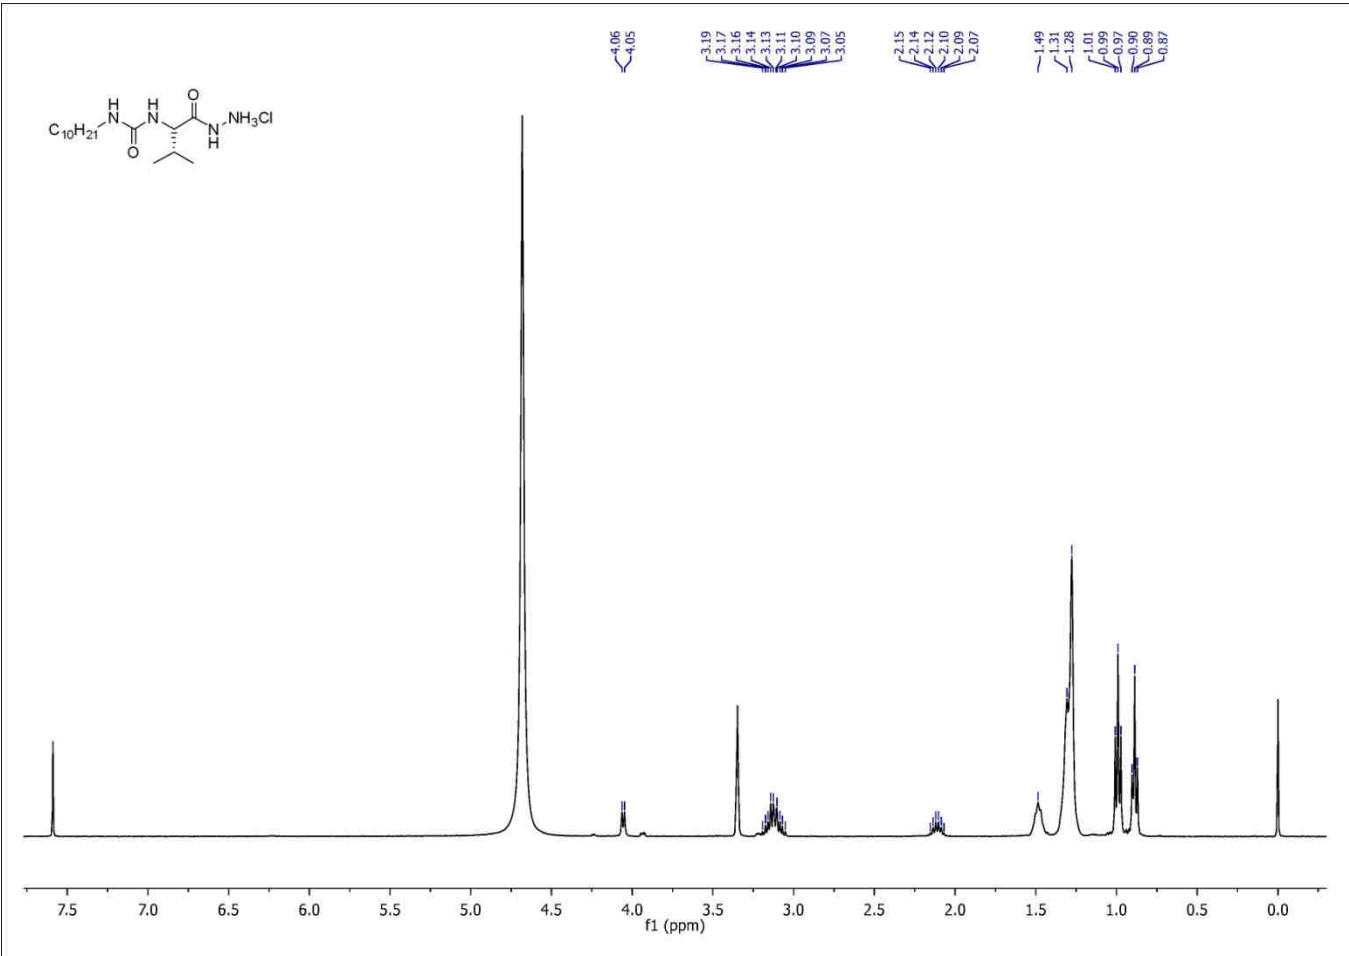

Compound 27

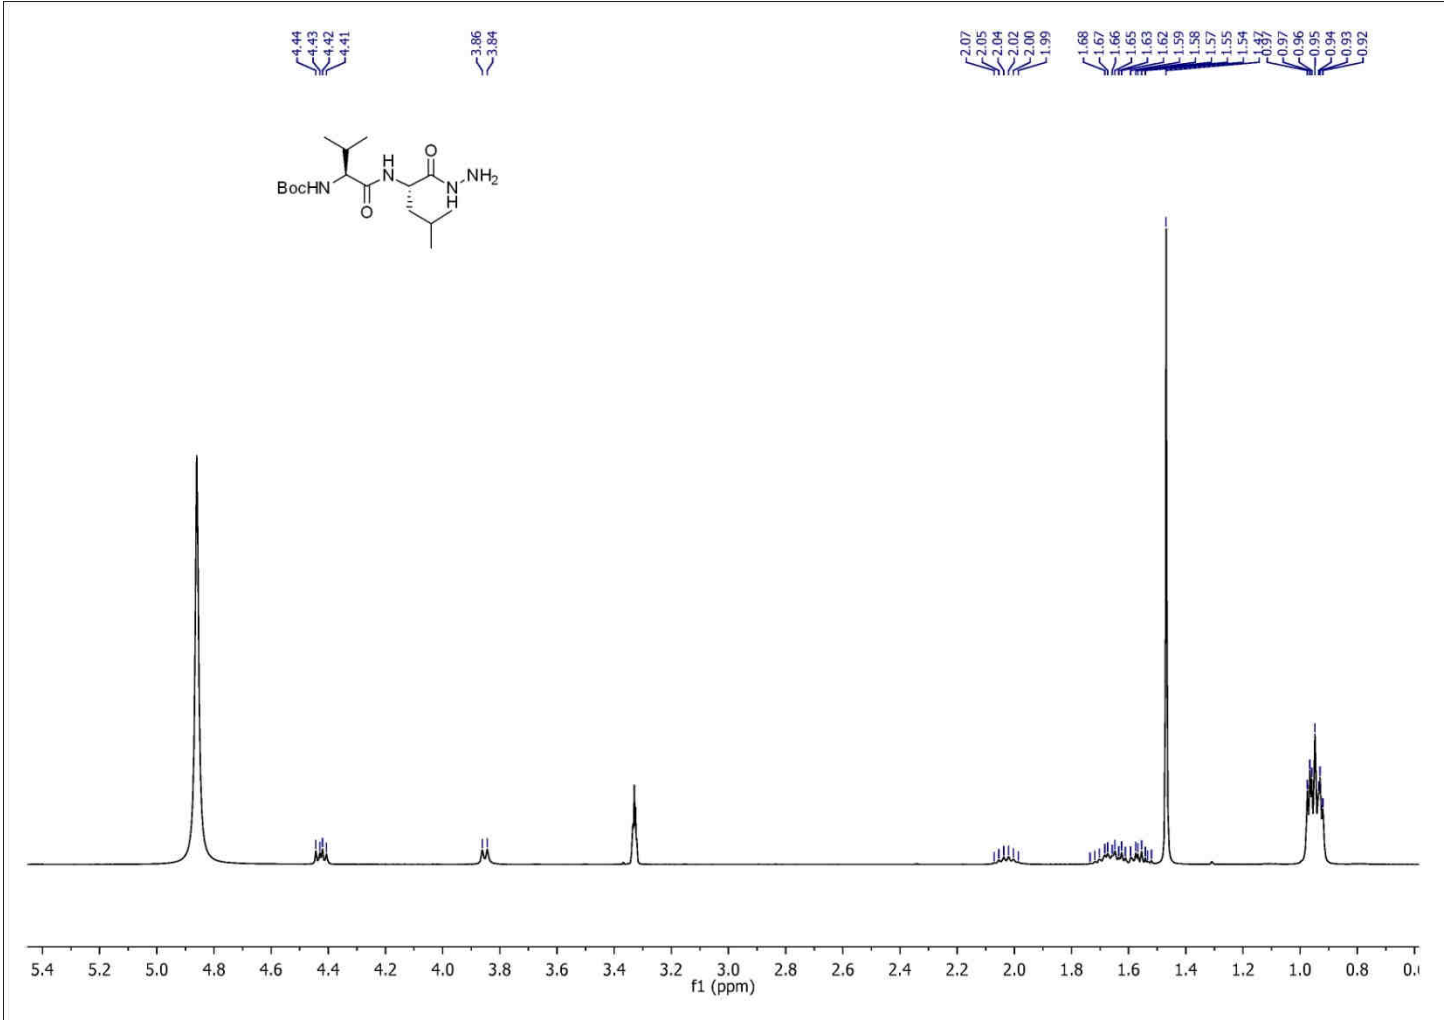







# Compound 33

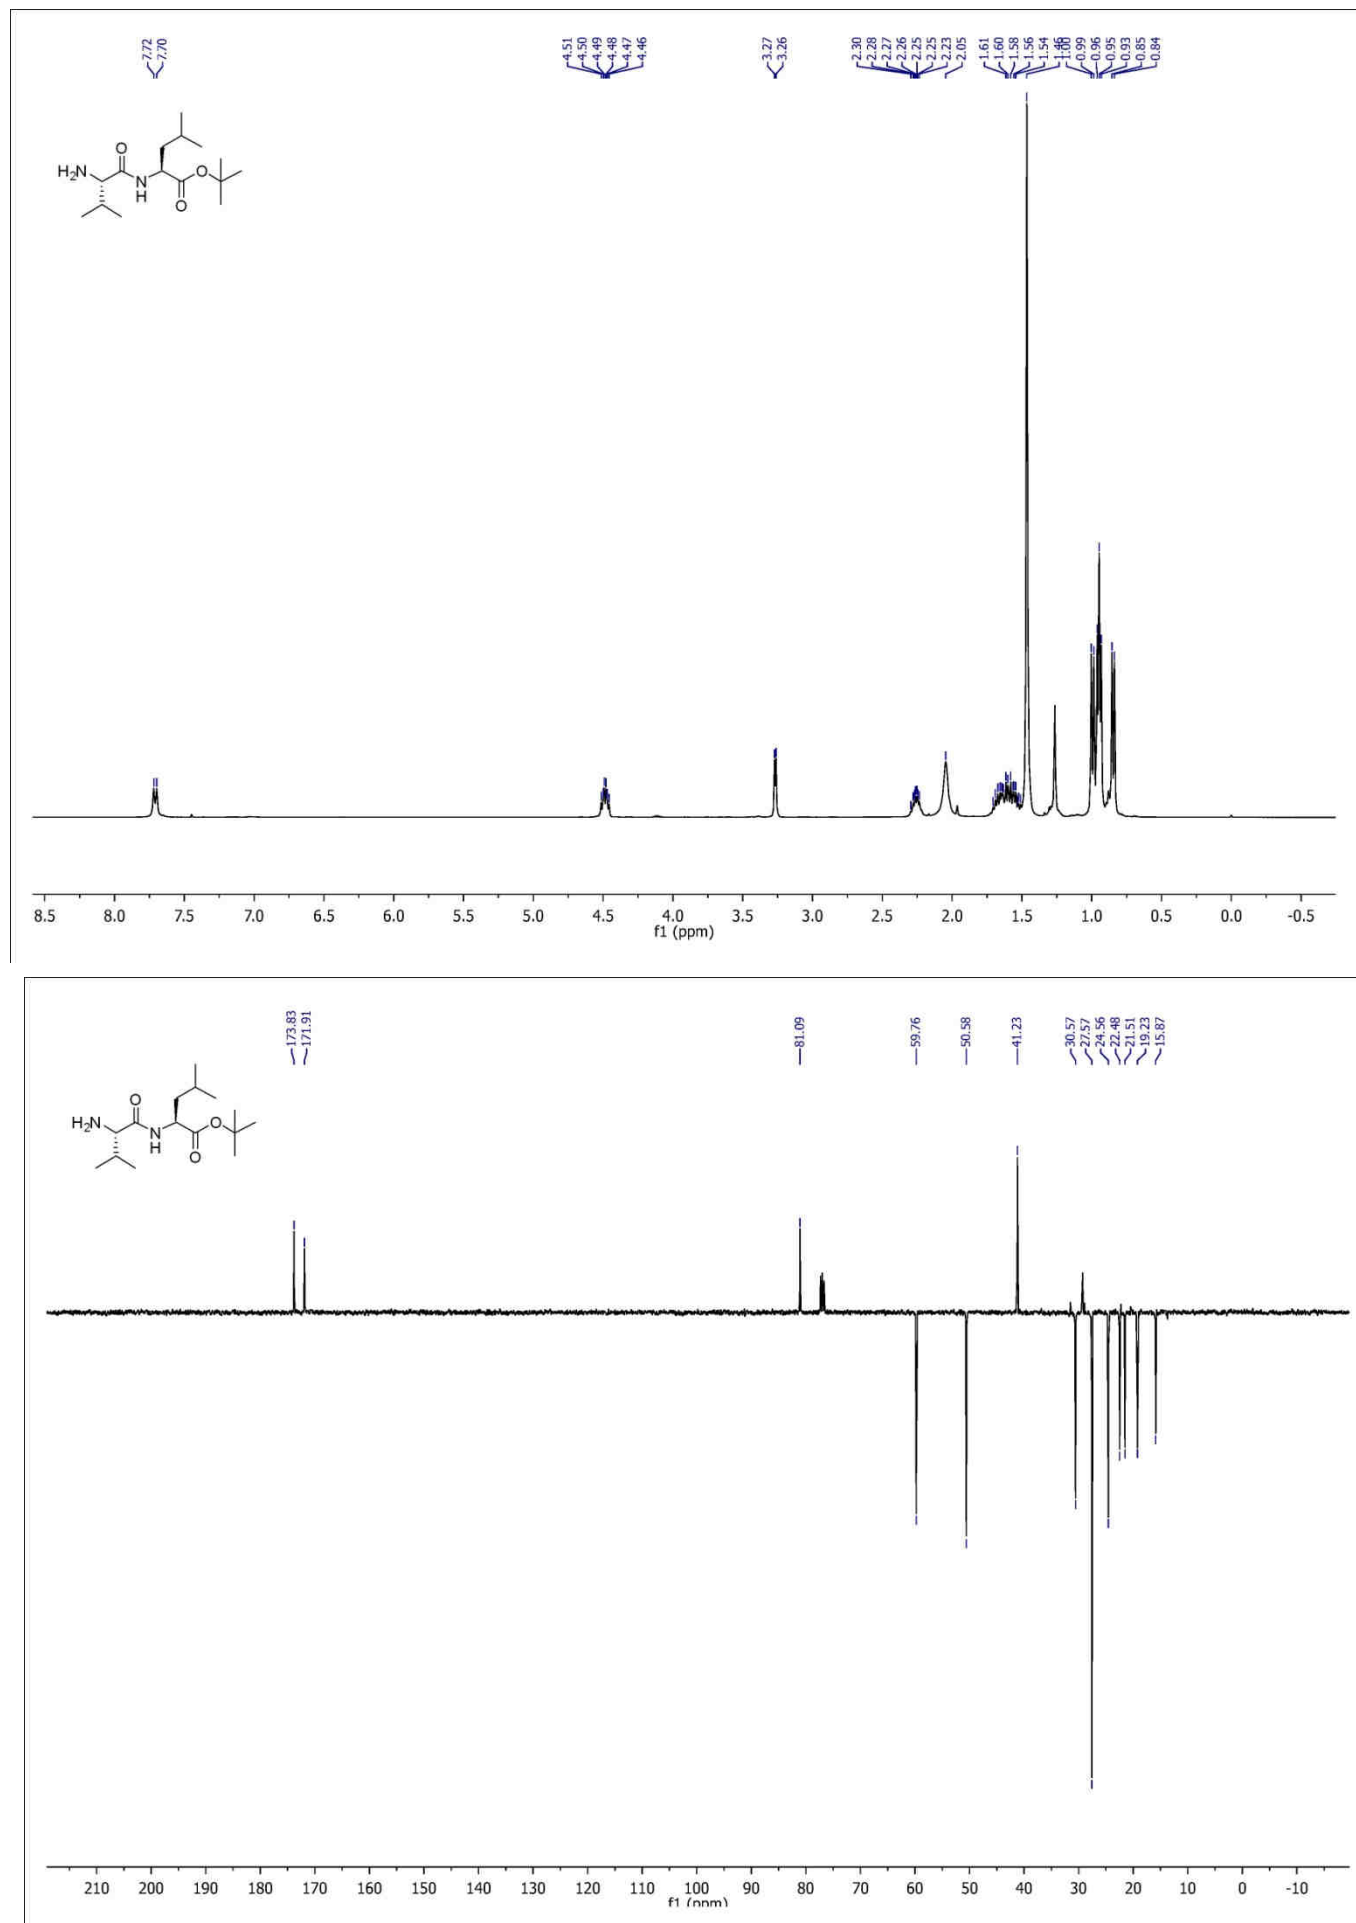

## Compound 34

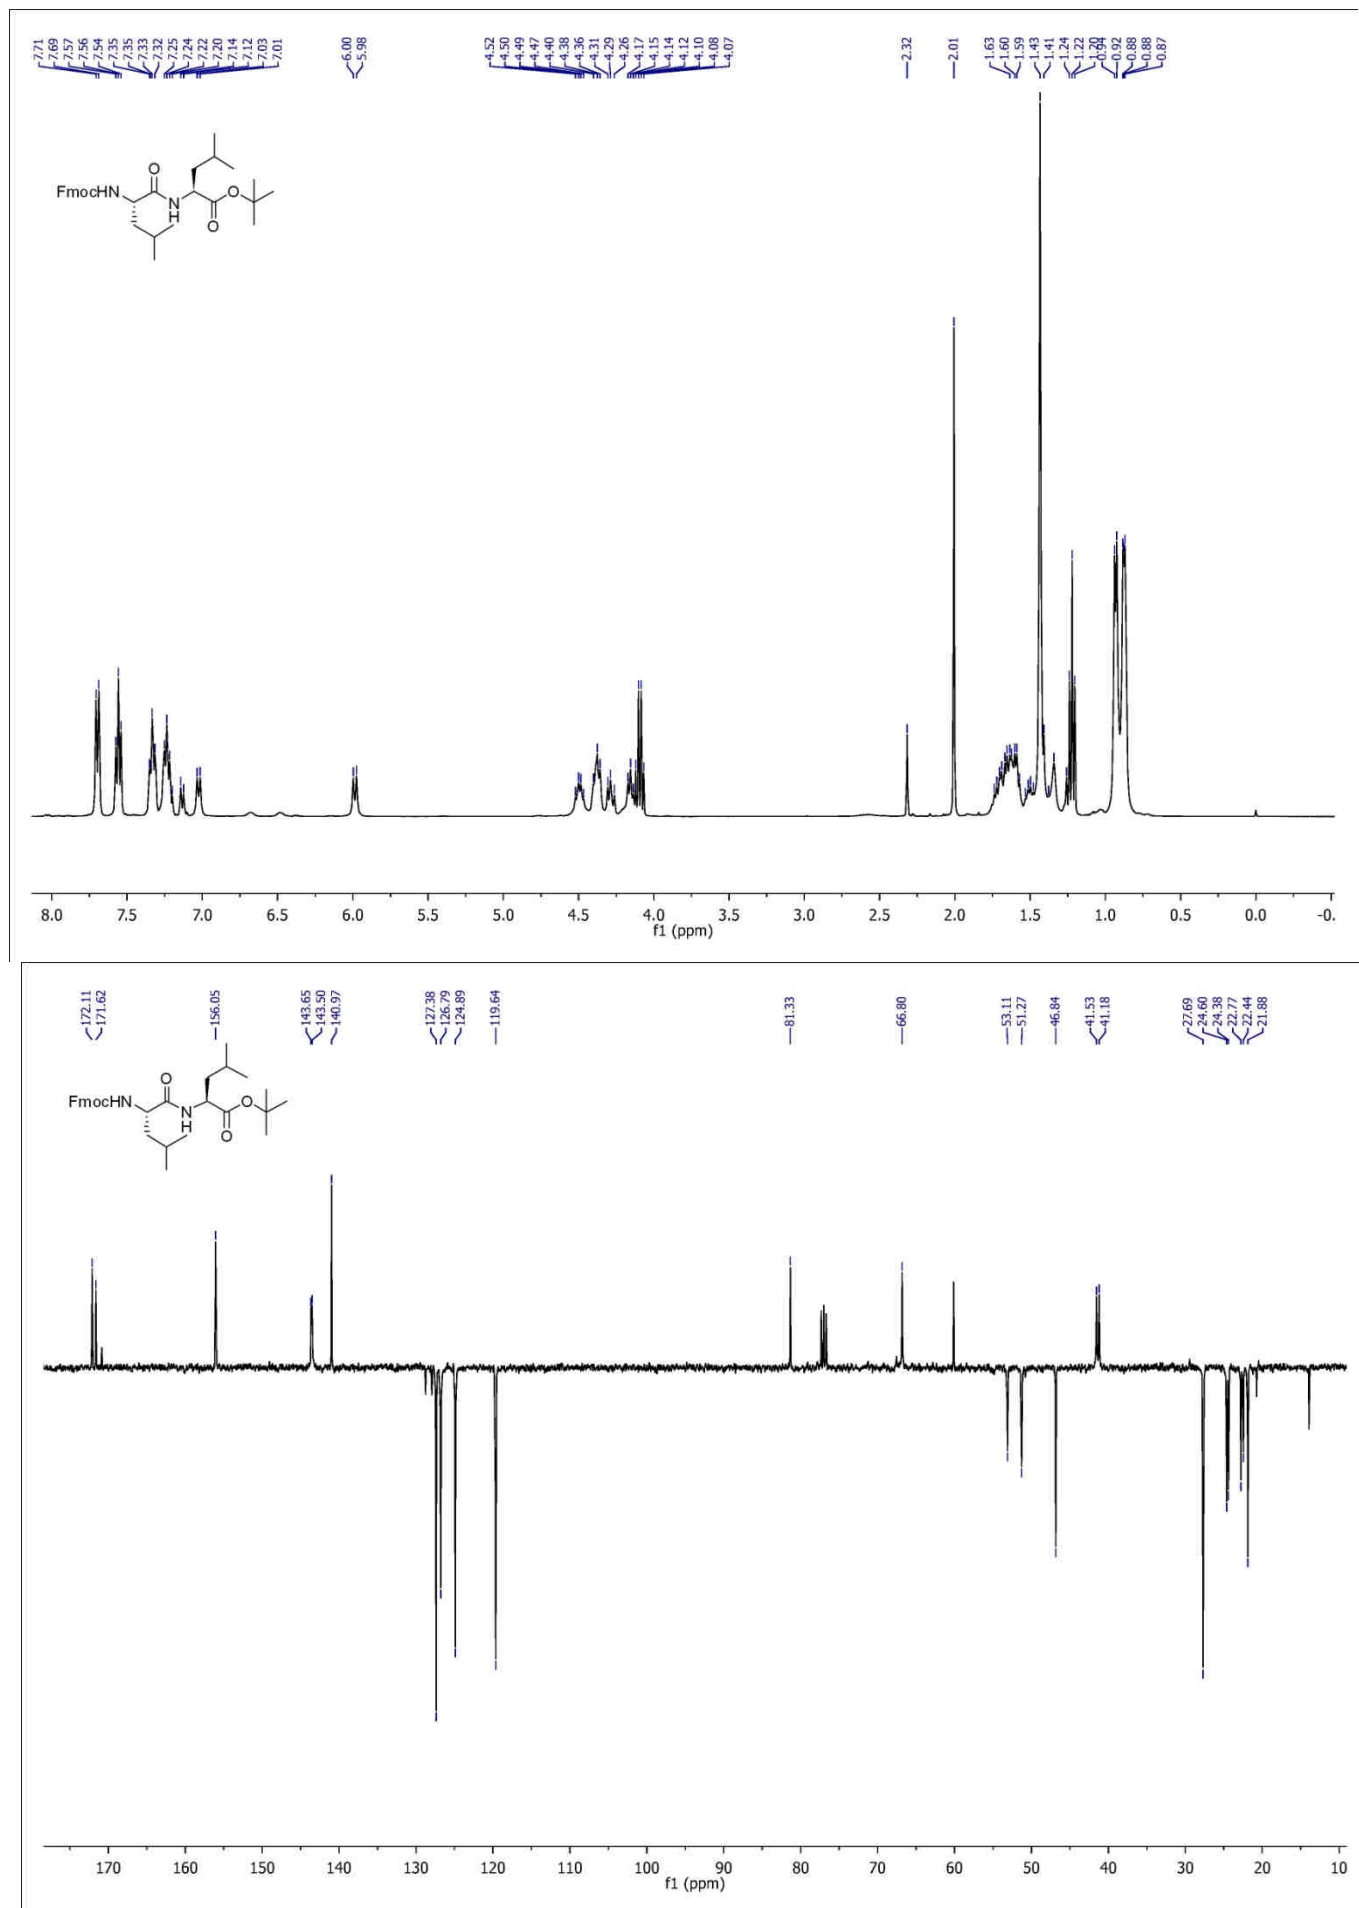

# Compound 35

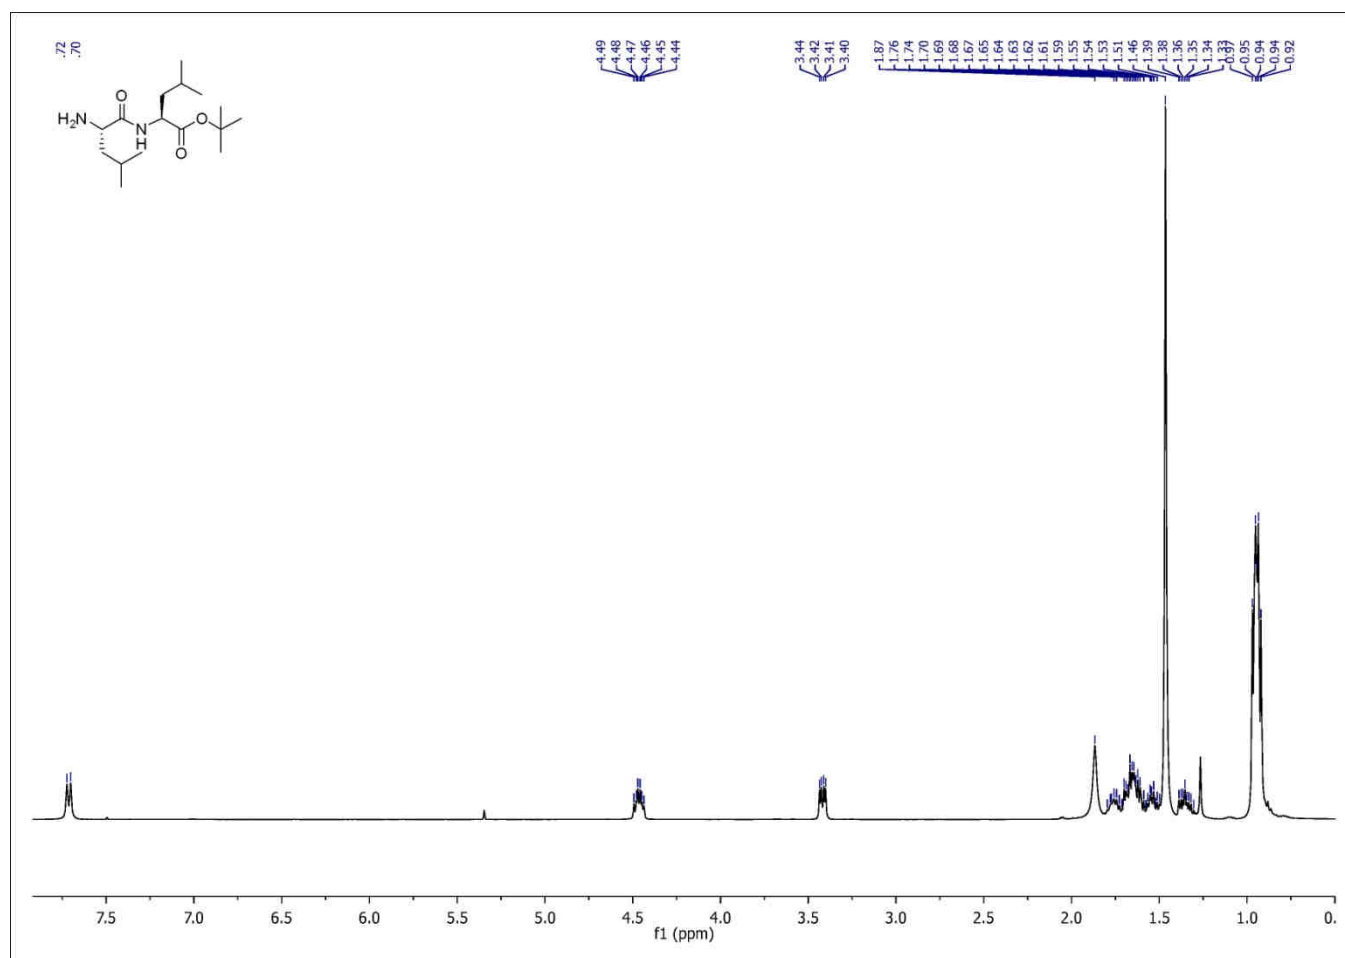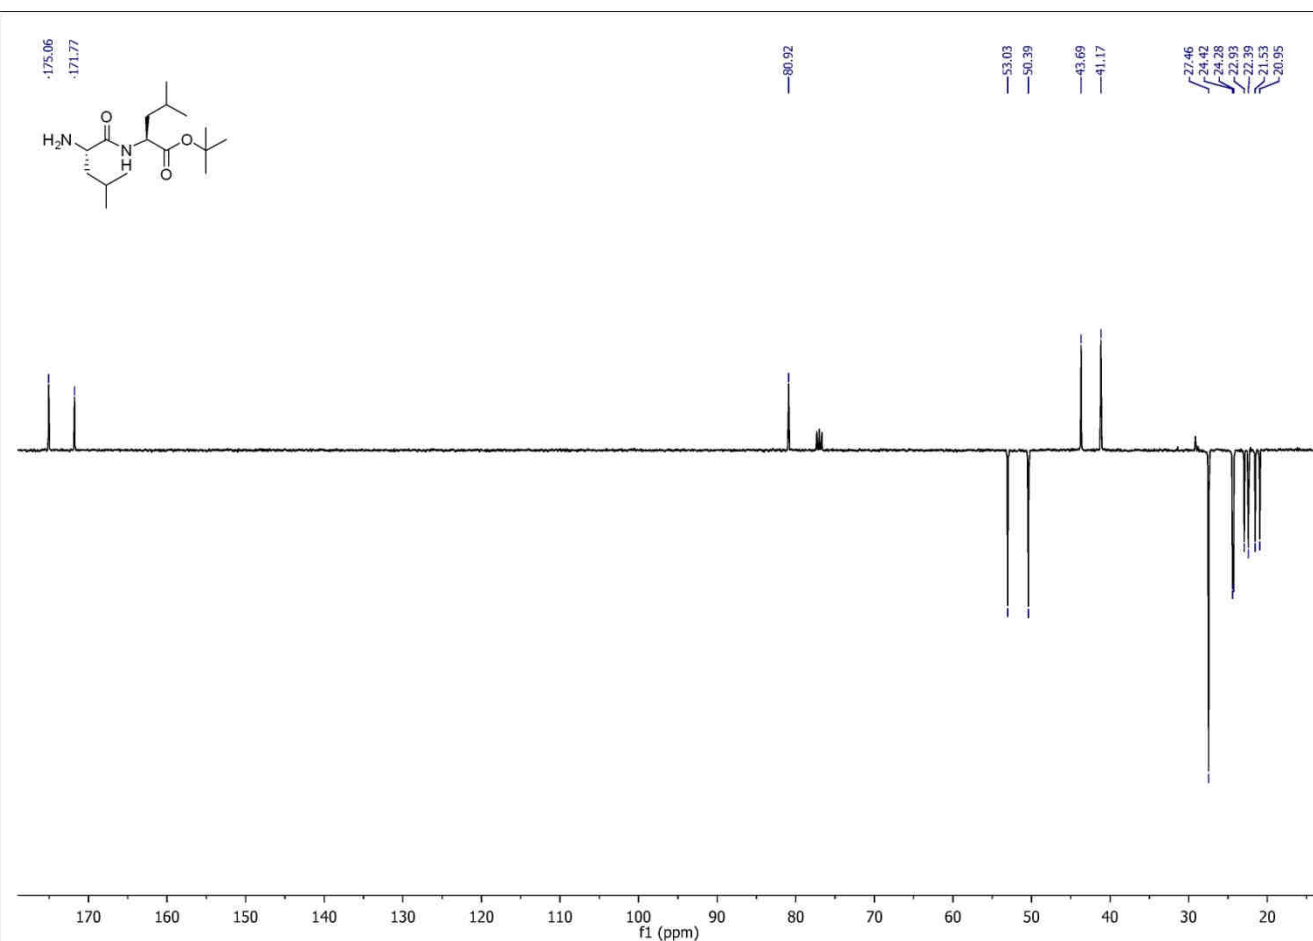

## Compound 36

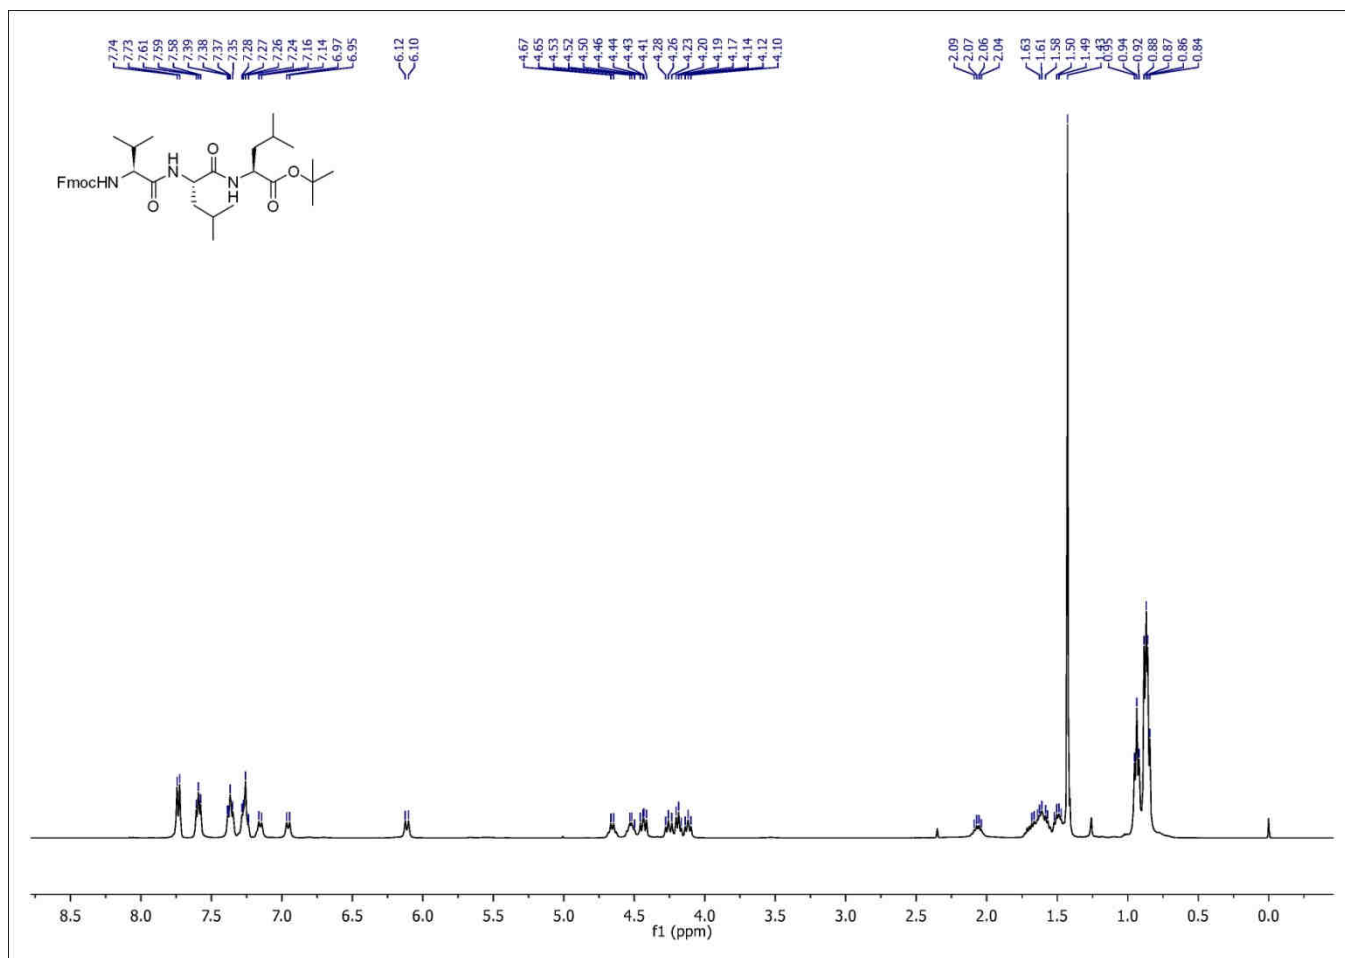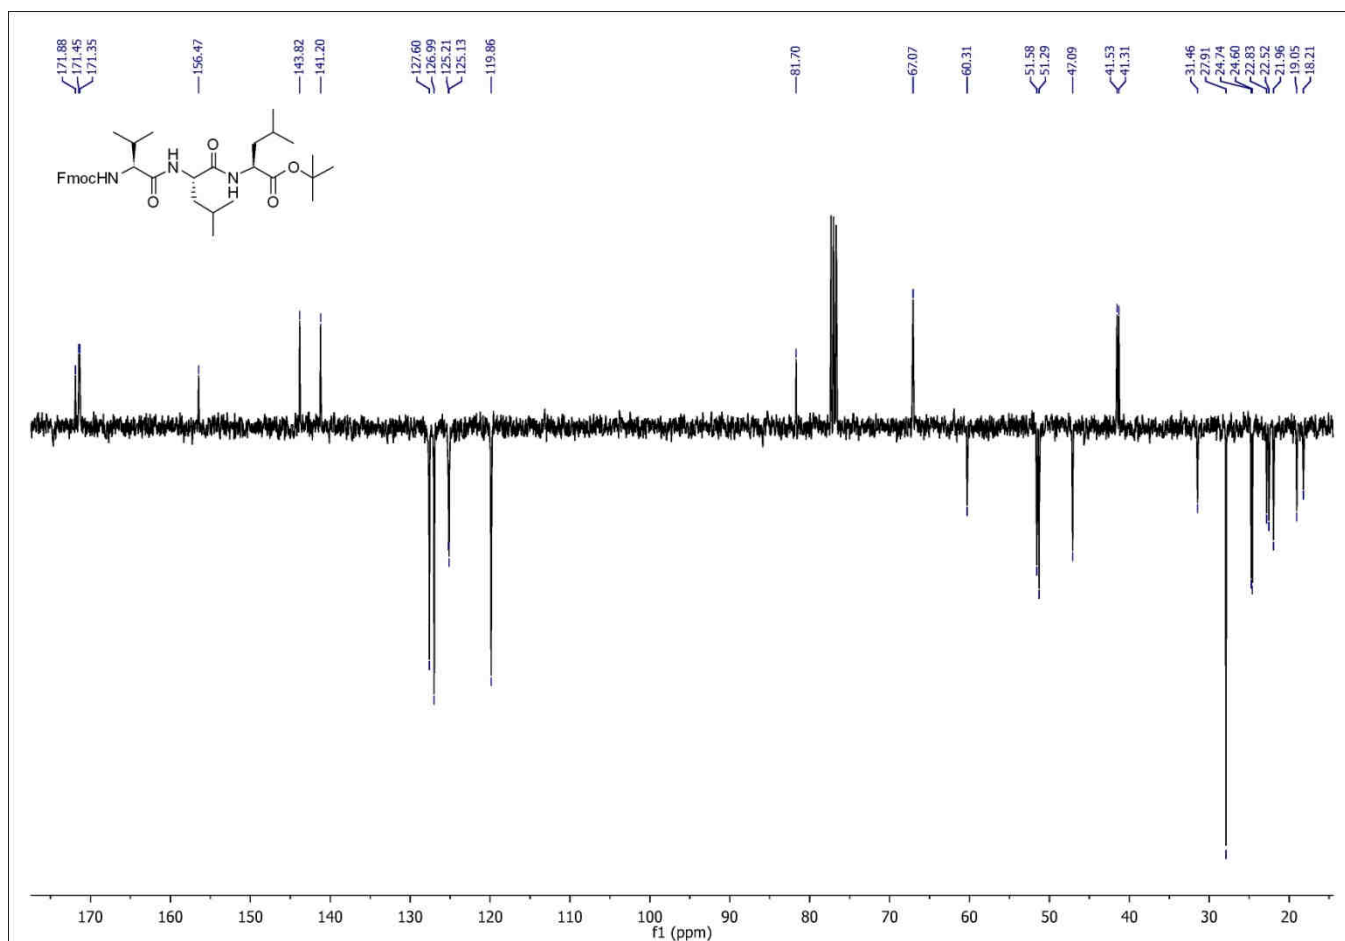

# Compound 37

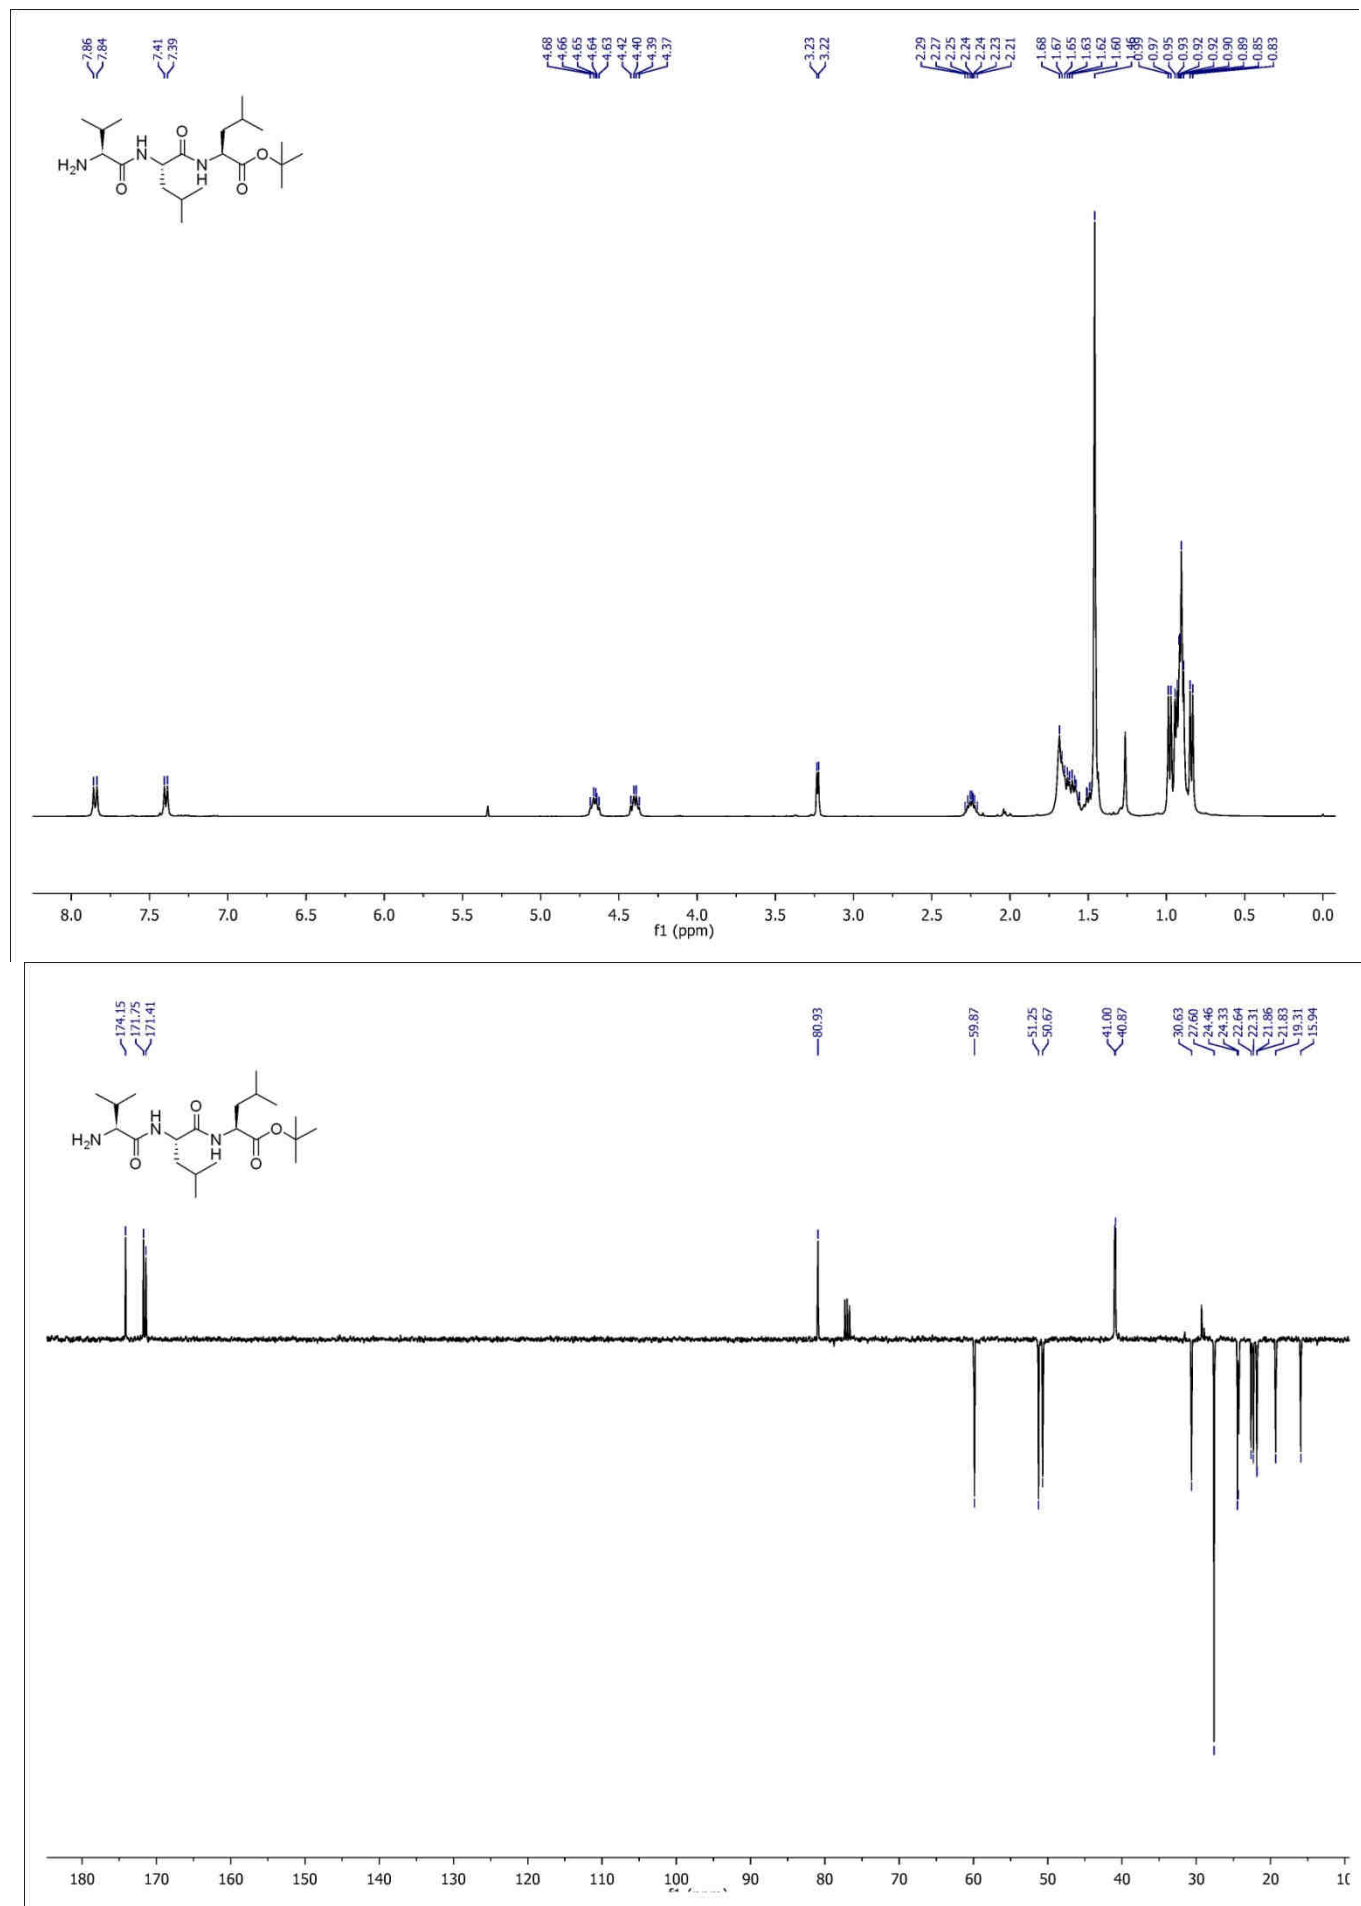







## Figure S2: gels of competition assay in living HEK293T cells

Typhoon readout of competition assay in living HEK293T cells of indicated inhibitors versus MVB003

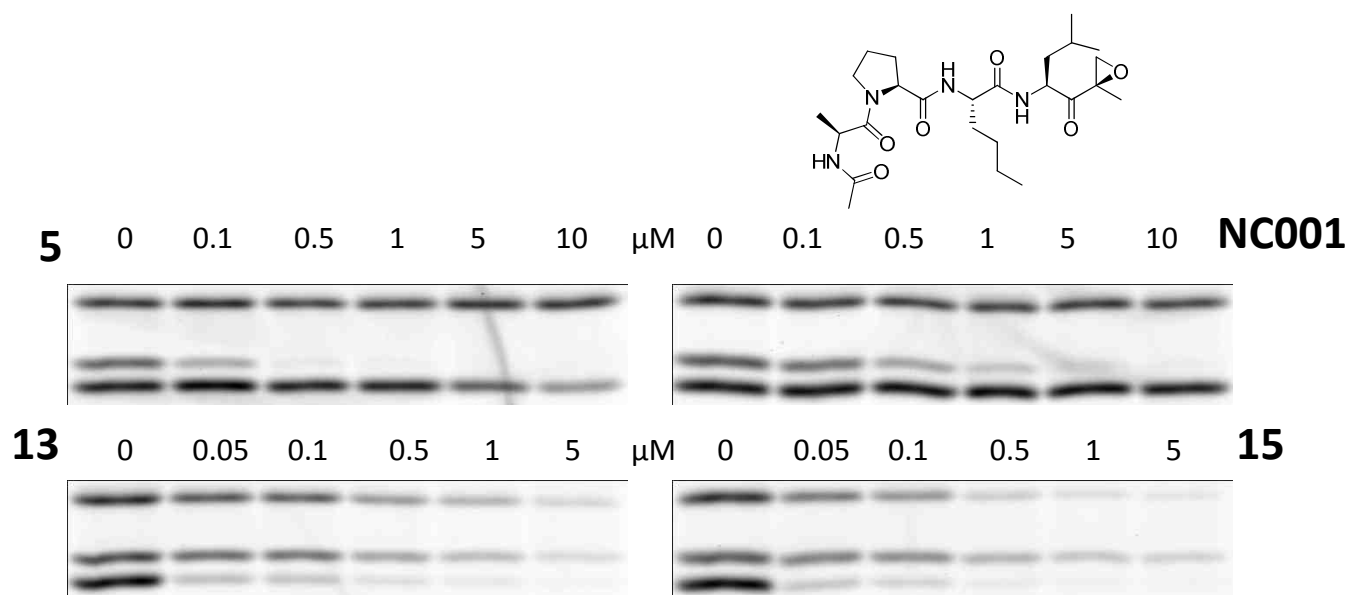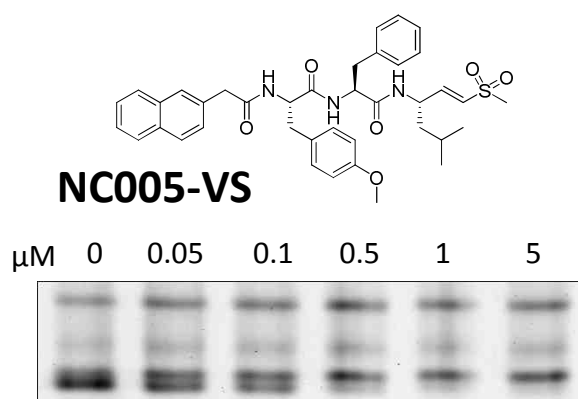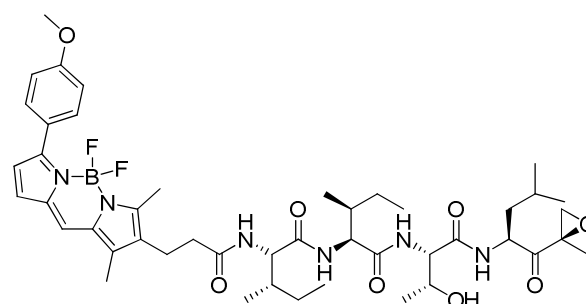

**MVB003**

Coomassie Brilliant Blue staining of gels

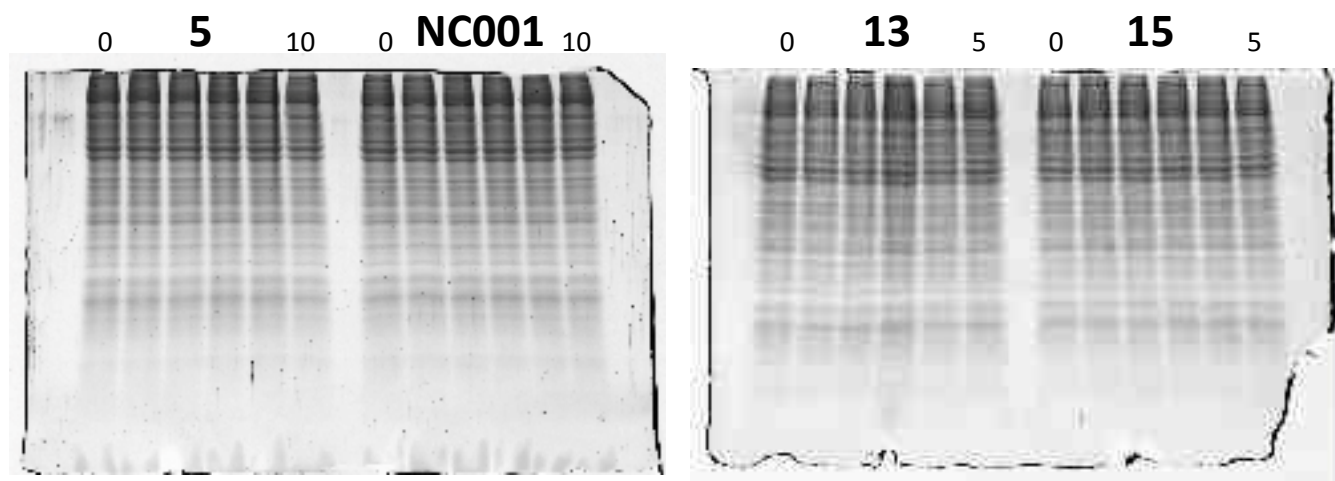

Supplement: c1ob06554h.pdf [file c1ob06554h.pdf]
